# Supplementary material for: Predictions and experimental tests of a new biophysical model of the mammalian respiratory oscillator
Source: eLife. 2022 Jul 7;11:e74762. doi: 10.7554/eLife.74762 (PMC9262387; doi:10.7554/eLife.74762)
Supplement: Figure 1—figure supplement 1—source data 1. [file elife-74762-fig1-figsupp1-data1.xlsx]

## Sheet: Figure 1-figure supplement 1
A (Top) Burst Frequency			IAPP (pA)
			0	0.172414	0.344828	0.517241	0.689655	0.862069	1.03448	1.2069	1.37931	1.55172	1.72414	1.89655	2.06897	2.24138	2.41379	2.58621	2.75862	2.93103	3.10345	3.27586	3.44828	3.62069	3.7931	3.96552	4.13793	4.31034	4.48276	4.65517	4.82759	5
	% gCAN Reduction	100	0.94894	1.0874	1.23197	1.37124	1.51739	1.68674	1.85449	2.04538	2.18602	2.35771	2.55915	2.76807	2.99159	3.22198	3.47221	3.74764	4.12377	4.4794	4.86676	5.27845	5.67209	6.12779	6.54853	6.97737	7.38181	7.77731	8.27463	8.63098	5.1743	2.85108
		96.5517	0.953842	1.08658	1.23055	1.38031	1.5267	1.68265	1.85761	2.02354	2.18331	2.3579	2.54602	2.73619	2.97335	3.19095	3.41307	3.66664	4.08928	4.44712	4.82115	5.22102	5.59569	6.03187	6.43254	6.78126	7.13055	7.50496	7.90946	8.53166	5.43213	2.80031
		93.1034	0.956883	1.08901	1.22548	1.36228	1.53281	1.67338	1.86391	2.01911	2.20591	2.35423	2.54613	2.71721	2.99149	3.14299	3.41259	3.6434	4.04794	4.39047	4.75756	5.13683	5.49205	5.89393	6.29165	6.6725	6.95622	7.23942	7.6151	8.18672	6.11897	2.7014
		89.6552	0.96098	1.09577	1.22961	1.36634	1.55468	1.71607	1.8711	2.03114	2.16179	2.34417	2.52275	2.67653	2.9858	3.10512	3.3983	3.6554	4.0076	4.33734	4.6672	5.02812	5.37531	5.78072	6.15486	6.49887	6.79209	7.0694	7.33068	7.82513	6.9553	3.10696
		86.2069	0.956738	1.10161	1.23668	1.37534	1.55028	1.6997	1.87243	2.0204	2.13381	2.31416	2.50987	2.64283	2.92276	3.0915	3.37975	3.65789	3.96104	4.2814	4.59347	4.94453	5.30644	5.69104	6.06032	6.34116	6.61975	6.79611	7.00195	7.43538	6.57151	3.14797
		82.7586	0.961714	1.10042	1.23478	1.37204	1.58514	1.70876	1.87443	2.02319	2.13139	2.32626	2.48752	2.6131	2.87325	3.07943	3.34667	3.62753	3.91448	4.22866	4.55305	4.90054	5.25556	5.59939	5.91359	6.1714	6.40444	6.64014	6.76572	7.09708	6.95696	4.00232
		79.3103	0.967189	1.10412	1.24662	1.37925	1.59781	1.73036	1.83764	2.02622	2.13242	2.3073	2.42016	2.60301	2.82624	3.06799	3.29782	3.57513	3.86692	4.18339	4.49493	4.81844	5.14807	5.48281	5.7918	6.06082	6.29496	6.41589	6.52636	6.78796	6.9465	4.25787
		75.8621	0.968997	1.10682	1.24606	1.37884	1.60447	1.69432	1.82355	2.01084	2.12632	2.25805	2.41503	2.59284	2.80769	3.04155	3.25671	3.53599	3.81685	4.12536	4.441	4.74055	5.06371	5.39214	5.67892	5.90958	6.10866	6.24256	6.32234	6.53975	6.91396	4.77629
		72.4138	0.970781	1.10613	1.24568	1.37929	1.62149	1.75049	1.82466	1.97136	2.10631	2.2463	2.40607	2.57133	2.7718	2.99373	3.23944	3.50646	3.78149	4.06862	4.36964	4.67092	4.98159	5.28531	5.54667	5.79713	5.97557	6.09984	6.1597	6.26563	6.51626	5.37791
		68.9655	0.978941	1.11139	1.25062	1.38409	1.59962	1.7107	1.7951	1.92174	2.07571	2.22869	2.38946	2.55702	2.75118	2.96949	3.21572	3.48569	3.7557	4.03504	4.32793	4.60436	4.89305	5.1676	5.4457	5.68381	5.83368	5.91572	5.97842	6.01178	6.51879	5.39034
		65.5172	0.973335	1.10917	1.23929	1.38365	1.54049	1.6461	1.78194	1.90933	2.06502	2.20383	2.36735	2.54635	2.74551	2.93971	3.18796	3.43577	3.70805	3.97304	4.26249	4.54458	4.83727	5.11157	5.34805	5.54707	5.67433	5.79861	5.80802	5.84136	6.26463	5.57575
		62.069	0.976208	1.113	1.24453	1.36573	1.49593	1.61713	1.7598	1.89813	2.03996	2.20134	2.35701	2.52305	2.72326	2.93352	3.16967	3.41943	3.67913	3.935	4.21441	4.47574	4.74684	4.9963	5.20584	5.41693	5.56757	5.63392	5.66646	5.60155	6.03227	5.48611
		58.6207	0.981691	1.11299	1.23738	1.36938	1.50012	1.62354	1.75857	1.89304	2.0349	2.19141	2.34901	2.52419	2.69605	2.91212	3.14218	3.37587	3.62565	3.88077	4.15368	4.40319	4.64983	4.89356	5.15544	5.31217	5.42653	5.51813	5.49915	5.41809	5.66626	5.71235
		55.1724	0.983548	1.11411	1.2449	1.36835	1.49833	1.62855	1.75736	1.88906	2.03376	2.18244	2.3366	2.50645	2.6845	2.88668	3.10963	3.34795	3.59624	3.84373	4.08814	4.34296	4.59309	4.81446	4.99801	5.16711	5.32033	5.36306	5.3548	5.27077	5.36145	5.66187
		51.7241	0.982458	1.11429	1.24491	1.37205	1.49779	1.62593	1.75195	1.88385	2.02437	2.174	2.32174	2.49453	2.65677	2.8762	3.08648	3.31203	3.54662	3.78159	4.02971	4.25787	4.50002	4.71775	4.91215	5.07311	5.18907	5.23667	5.23693	5.11165	5.14114	5.53661
		48.2759	0.987403	1.11154	1.24207	1.37026	1.49746	1.62712	1.7533	1.88673	2.0211	2.16178	2.31236	2.47617	2.64714	2.85179	3.05444	3.28685	3.51201	3.76093	3.98768	4.21657	4.43503	4.63102	4.79852	4.95388	5.09082	5.10955	5.1166	4.99397	4.89448	5.42025
		44.8276	0.984781	1.11944	1.23985	1.36754	1.49724	1.61717	1.74948	1.87837	2.01677	2.15712	2.30391	2.45689	2.63273	2.82579	3.02598	3.24592	3.47357	3.70677	3.94039	4.15345	4.34487	4.52084	4.70248	4.87159	4.93982	5.00947	4.95397	4.85621	4.69362	5.22602
		41.3793	0.986929	1.11429	1.24396	1.37306	1.49734	1.61786	1.74562	1.87148	1.99664	2.13649	2.29073	2.44244	2.61335	2.80005	3.01018	3.21742	3.42467	3.64447	3.87349	4.07947	4.27593	4.4673	4.60926	4.73946	4.84162	4.88509	4.84476	4.74533	4.5292	5.13383
		37.931	0.9888	1.11824	1.2472	1.35825	1.49376	1.61342	1.73634	1.86724	2.00176	2.12923	2.27627	2.42336	2.58979	2.77629	2.96869	3.18306	3.4017	3.60668	3.82275	4.03375	4.20699	4.36713	4.52122	4.63996	4.73813	4.76657	4.73642	4.59087	4.34881	4.93249
		34.4828	0.990821	1.1179	1.2485	1.36598	1.48131	1.60784	1.73188	1.85734	1.98403	2.11334	2.25823	2.41079	2.57491	2.75083	2.9414	3.14897	3.36015	3.55319	3.75846	3.95587	4.13207	4.30224	4.43208	4.53712	4.62092	4.62877	4.58187	4.47456	4.20698	4.72236
		31.0345	0.989423	1.12066	1.24699	1.36941	1.49051	1.59444	1.73012	1.85054	1.97676	2.1075	2.24835	2.39339	2.5488	2.72478	2.91858	3.10839	3.32553	3.51284	3.69712	3.87242	4.05242	4.20324	4.33642	4.4286	4.51154	4.50465	4.44601	4.3064	4.02609	4.55835
		27.5862	0.99381	1.11703	1.24605	1.36696	1.48736	1.59833	1.7262	1.85236	1.97504	2.09291	2.23407	2.37827	2.53808	2.70511	2.90278	3.08918	3.28219	3.4735	3.65426	3.81804	3.98337	4.12025	4.23414	4.33609	4.38677	4.38246	4.31894	4.17321	3.85728	4.38997
		24.1379	0.995399	1.12137	1.24357	1.36492	1.48828	1.59837	1.71247	1.8344	1.95993	2.08568	2.22154	2.35806	2.50606	2.68155	2.86635	3.04334	3.23852	3.41728	3.58249	3.74897	3.90284	4.03754	4.14336	4.23042	4.26442	4.25224	4.17677	4.01538	3.68715	4.18275
		20.6897	0.996012	1.11788	1.24192	1.3635	1.47895	1.59887	1.71082	1.83003	1.94412	2.07946	2.19942	2.34091	2.49141	2.65527	2.82781	3.0166	3.19606	3.37251	3.52663	3.69893	3.84108	3.94907	4.05869	4.12088	4.14551	4.1276	4.04243	3.87938	3.48375	4.02757
		17.2414	0.996181	1.12066	1.24854	1.35852	1.47267	1.58422	1.70794	1.81476	1.94053	2.06963	2.18733	2.31941	2.46491	2.63715	2.81168	2.98812	3.153	3.3233	3.47836	3.62775	3.76767	3.88525	3.97244	4.01825	4.02491	3.99562	3.89611	3.70551	3.23662	3.79815
		13.7931	0.998386	1.12646	1.24633	1.35806	1.47039	1.57727	1.70001	1.80916	1.93011	2.04857	2.1746	2.30642	2.44794	2.6105	2.77985	2.96624	3.11335	3.27297	3.42572	3.56186	3.69045	3.79602	3.8774	3.90829	3.92408	3.88347	3.76682	3.52709	3.04424	3.6693
		10.3448	0.996018	1.12315	1.24062	1.34872	1.46357	1.56715	1.69782	1.79905	1.92388	2.03463	2.15896	2.2821	2.42846	2.58068	2.74699	2.9294	3.07609	3.22406	3.3739	3.51888	3.62231	3.72347	3.7828	3.81201	3.8233	3.74439	3.60525	3.33035	3.05552	2.59919
		6.89655	0.999342	1.12247	1.23873	1.35387	1.46322	1.57502	1.68211	1.79521	1.90768	2.02431	2.14042	2.26399	2.40807	2.57057	2.72324	2.88266	3.04542	3.19473	3.32038	3.44766	3.54651	3.64389	3.7023	3.71039	3.69241	3.61552	3.42277	3.09196	3.38922	2.37864
		3.44828	0.998731	1.12554	1.23129	1.35406	1.45747	1.56343	1.67431	1.78854	1.89675	2.00606	2.12495	2.24674	2.38499	2.54135	2.69869	2.84709	2.99025	3.14529	3.27286	3.38344	3.4892	3.56328	3.59586	3.61433	3.57577	3.46951	3.28346	2.83842	3.03252	0.793694
		0	1	1.12189	1.24266	1.34432	1.45249	1.56125	1.66759	1.77848	1.88641	2.00291	2.11424	2.23403	2.37197	2.52201	2.67552	2.82777	2.95943	3.1041	3.21274	3.31693	3.41672	3.48759	3.5224	3.49781	3.44661	3.31126	3.07331	2.45569	1.78142	0.135099
A (Bottom) Burst Amplitude			IAPP (pA)
			0	0.172414	0.344828	0.517241	0.689655	0.862069	1.03448	1.2069	1.37931	1.55172	1.72414	1.89655	2.06897	2.24138	2.41379	2.58621	2.75862	2.93103	3.10345	3.27586	3.44828	3.62069	3.7931	3.96552	4.13793	4.31034	4.48276	4.65517	4.82759	5
	% gCAN Reduction	100	0.574818	0.543644	0.504906	0.472203	0.459784	0.403525	0.40339	0.345763	0.344325	0.330073	0.306823	0.29201	0.281733	0.269249	0.25865	0.269997	0.258939	0.242672	0.232588	0.220763	0.213676	0.206743	0.199932	0.189957	0.178011	0.164934	0.148507	0.127105	0.120271	0.131525
		96.5517	0.587893	0.561017	0.534087	0.490169	0.485188	0.417085	0.413317	0.375506	0.358051	0.340339	0.325781	0.307183	0.284746	0.272316	0.255932	0.249031	0.265391	0.252742	0.241777	0.229831	0.220339	0.215637	0.20505	0.196219	0.184419	0.17462	0.154644	0.128013	0.123313	0.13145
		93.1034	0.62276	0.583051	0.554736	0.521695	0.513191	0.437424	0.429298	0.379661	0.360349	0.34615	0.32471	0.315006	0.29182	0.280707	0.273272	0.269492	0.273632	0.259145	0.246297	0.237288	0.226634	0.218067	0.211299	0.204121	0.190844	0.179569	0.162478	0.138094	0.125861	0.134746
		89.6552	0.640194	0.608051	0.583427	0.542373	0.512896	0.434681	0.426877	0.395845	0.377331	0.355642	0.336307	0.321951	0.286957	0.282726	0.285919	0.292615	0.276966	0.261941	0.25226	0.241302	0.231501	0.223272	0.217238	0.209492	0.200326	0.186534	0.168039	0.146418	0.132816	0.134361
		86.2069	0.661017	0.629661	0.593597	0.551186	0.559175	0.450587	0.447458	0.41006	0.394915	0.370751	0.345406	0.333051	0.298305	0.290804	0.29671	0.295157	0.283955	0.272229	0.258402	0.248316	0.236786	0.230353	0.22249	0.213804	0.204867	0.191786	0.178657	0.153892	0.136986	0.136849
		82.7586	0.682324	0.64322	0.611676	0.571864	0.522623	0.463103	0.45908	0.423182	0.409746	0.375981	0.358252	0.344237	0.311556	0.292557	0.306148	0.304838	0.296352	0.28178	0.265666	0.251571	0.243983	0.236106	0.226485	0.218608	0.211622	0.200133	0.185007	0.163528	0.136891	0.138041
		79.3103	0.692978	0.672034	0.628249	0.586102	0.541525	0.473012	0.483293	0.434554	0.420551	0.38664	0.378928	0.35322	0.329365	0.312454	0.316339	0.320863	0.303016	0.282945	0.270695	0.256986	0.247979	0.241001	0.232108	0.223948	0.216737	0.21183	0.193695	0.173142	0.142081	0.141112
		75.8621	0.73753	0.678814	0.645951	0.602373	0.549153	0.504678	0.499274	0.449718	0.426483	0.411166	0.381168	0.367145	0.344028	0.338836	0.331788	0.322411	0.308708	0.289373	0.277368	0.268958	0.255778	0.246962	0.2376	0.23021	0.221761	0.216806	0.204379	0.184068	0.15109	0.14855
		72.4138	0.742373	0.705932	0.65951	0.625085	0.554802	0.494133	0.51477	0.470282	0.442646	0.415354	0.394162	0.379835	0.352542	0.359925	0.345624	0.330157	0.317826	0.300492	0.283531	0.27081	0.260482	0.253526	0.241436	0.236222	0.229845	0.221926	0.214208	0.19428	0.156503	0.150646
		68.9655	0.765617	0.728215	0.672693	0.637966	0.595763	0.533246	0.526303	0.493746	0.459049	0.439445	0.413748	0.389917	0.373366	0.367307	0.35614	0.338599	0.323437	0.308419	0.291012	0.277676	0.268475	0.261661	0.248805	0.242899	0.234275	0.226709	0.221002	0.20479	0.165133	0.155168
		65.5172	0.784988	0.744566	0.704331	0.652881	0.616654	0.571932	0.536095	0.515722	0.474358	0.456497	0.426365	0.398957	0.386764	0.374268	0.361582	0.347327	0.326018	0.312429	0.300704	0.285521	0.274576	0.266232	0.259446	0.249093	0.241808	0.233708	0.226547	0.219691	0.178483	0.161676
		62.069	0.82276	0.764506	0.719397	0.678983	0.637596	0.599718	0.555179	0.522501	0.501017	0.460606	0.439516	0.412132	0.399193	0.384746	0.369633	0.351499	0.336804	0.324045	0.306886	0.290728	0.280567	0.275379	0.265608	0.256565	0.2467	0.242255	0.237834	0.227717	0.190874	0.16656
		58.6207	0.83293	0.785244	0.728814	0.688136	0.64376	0.600949	0.568989	0.535827	0.503277	0.474165	0.451332	0.419625	0.406614	0.392316	0.377209	0.355201	0.345886	0.328136	0.313909	0.299924	0.289234	0.280859	0.272838	0.264742	0.258526	0.253753	0.248749	0.245538	0.214066	0.173425
		55.1724	0.84891	0.798804	0.745386	0.70339	0.667488	0.618847	0.582046	0.547516	0.510508	0.487519	0.45385	0.432649	0.417032	0.402311	0.381248	0.371153	0.350693	0.333123	0.319519	0.31207	0.298305	0.290518	0.281136	0.273504	0.268675	0.262836	0.25771	0.251695	0.232906	0.181172
		51.7241	0.857627	0.805932	0.758569	0.718305	0.676425	0.631356	0.599478	0.562946	0.523842	0.493008	0.465666	0.439429	0.426949	0.410632	0.391304	0.373695	0.352417	0.337347	0.324979	0.317601	0.305183	0.293314	0.289537	0.282545	0.274533	0.26901	0.268305	0.263364	0.243459	0.191464
		48.2759	0.861017	0.823305	0.770621	0.728814	0.688444	0.646893	0.604694	0.566686	0.537401	0.497246	0.476707	0.448191	0.438136	0.416333	0.398231	0.378983	0.363032	0.348101	0.332429	0.320763	0.311665	0.301265	0.296931	0.28769	0.28405	0.276662	0.276078	0.274933	0.257352	0.198016
		44.8276	0.881808	0.825	0.789077	0.744746	0.699538	0.651977	0.620339	0.583986	0.544633	0.515042	0.488717	0.464315	0.448983	0.432952	0.414001	0.391283	0.368276	0.356111	0.339983	0.328222	0.319466	0.31098	0.301789	0.295955	0.292417	0.291966	0.289206	0.284929	0.282674	0.208711
		41.3793	0.878644	0.848305	0.800753	0.748475	0.703544	0.669774	0.630508	0.591525	0.55774	0.525424	0.484746	0.468896	0.457966	0.43989	0.414011	0.39751	0.380052	0.361017	0.349555	0.333188	0.326571	0.315952	0.312349	0.306942	0.302886	0.298576	0.300779	0.301507	0.292311	0.21755
		37.931	0.892655	0.84661	0.800753	0.763051	0.716487	0.677966	0.63781	0.599274	0.564746	0.541949	0.504487	0.491067	0.47249	0.449879	0.428173	0.403814	0.387614	0.373251	0.354151	0.341095	0.333051	0.324191	0.320314	0.316352	0.312429	0.310657	0.313371	0.309734	0.305287	0.23548
		34.4828	0.902147	0.860169	0.816573	0.767797	0.727581	0.690113	0.652934	0.608475	0.577206	0.550465	0.515254	0.50113	0.485007	0.460856	0.431741	0.413415	0.399601	0.378657	0.368837	0.353107	0.341781	0.337314	0.332602	0.325915	0.32657	0.324946	0.327554	0.324726	0.318008	0.253903
		31.0345	0.926392	0.870339	0.830132	0.777966	0.743914	0.703955	0.664668	0.625908	0.591467	0.554183	0.528614	0.514124	0.495611	0.466667	0.453929	0.430725	0.405831	0.385185	0.374547	0.367366	0.353432	0.346398	0.341654	0.341614	0.337116	0.339081	0.339581	0.332934	0.334062	0.268927
		27.5862	0.924939	0.883475	0.834652	0.79661	0.742065	0.713277	0.676141	0.632688	0.59848	0.568179	0.538264	0.519586	0.504728	0.481356	0.452851	0.435962	0.420339	0.398849	0.384383	0.378609	0.36565	0.362493	0.360169	0.357473	0.351935	0.351025	0.348228	0.346822	0.343465	0.277452
		24.1379	0.944794	0.896186	0.849341	0.80339	0.761479	0.720904	0.68605	0.644552	0.609702	0.577802	0.552029	0.535981	0.520071	0.489789	0.464561	0.44731	0.428779	0.409778	0.397042	0.390009	0.376497	0.371437	0.369545	0.365678	0.359739	0.358686	0.355556	0.359541	0.355206	0.283475
		20.6897	0.954964	0.900847	0.86064	0.808136	0.768259	0.727684	0.685789	0.653995	0.619988	0.592674	0.565383	0.546634	0.525959	0.500678	0.473157	0.451827	0.433333	0.418345	0.406529	0.394552	0.388969	0.382106	0.37666	0.36971	0.368039	0.365555	0.365992	0.365068	0.362648	0.284635
		17.2414	0.955448	0.917797	0.870057	0.832881	0.786441	0.741243	0.699348	0.66368	0.630041	0.597485	0.57319	0.554189	0.535776	0.508475	0.479937	0.455292	0.442232	0.420881	0.413176	0.402465	0.396727	0.391638	0.384107	0.376162	0.37474	0.373993	0.375028	0.377845	0.376542	0.284395
		13.7931	0.959806	0.92161	0.880226	0.835932	0.790755	0.757062	0.71395	0.67646	0.643584	0.607232	0.588136	0.572397	0.541823	0.515763	0.483293	0.466102	0.445727	0.43459	0.419426	0.415066	0.402663	0.395441	0.391612	0.388023	0.385989	0.379776	0.384894	0.382423	0.377892	0.272485
		10.3448	0.986441	0.935593	0.887759	0.844746	0.805547	0.762859	0.718644	0.68801	0.653753	0.621469	0.600847	0.574477	0.556482	0.529161	0.498144	0.470508	0.454827	0.44386	0.428581	0.415478	0.408875	0.40559	0.399065	0.396376	0.389012	0.390842	0.388257	0.397424	0.358143	0.272191
		6.89655	0.987893	0.929661	0.901695	0.845763	0.807704	0.765819	0.723525	0.699812	0.664407	0.633446	0.609322	0.586042	0.561582	0.531073	0.499596	0.477658	0.462638	0.452119	0.437424	0.425293	0.420967	0.41477	0.409443	0.406185	0.403027	0.4	0.398957	0.404039	0.295381	0.29322
		3.44828	0.984019	0.945339	0.900565	0.867458	0.820647	0.779071	0.740339	0.70182	0.674459	0.642486	0.620551	0.593619	0.576836	0.540946	0.509301	0.487827	0.473371	0.456978	0.442753	0.43669	0.429165	0.425361	0.415285	0.410724	0.411927	0.408954	0.404704	0.413875	0.27735	0.318644
		0	1	0.957627	0.906591	0.872542	0.824653	0.788504	0.755525	0.717891	0.68194	0.657853	0.631602	0.601335	0.583239	0.547547	0.517239	0.492393	0.479507	0.45943	0.452024	0.448	0.440678	0.434026	0.427872	0.420723	0.416688	0.418305	0.41731	0.421072	0.298305	0.318644
C (Top) Burst Frequency			IAPP (pA)
			0	0.172414	0.344828	0.517241	0.689655	0.862069	1.03448	1.2069	1.37931	1.55172	1.72414	1.89655	2.06897	2.24138	2.41379	2.58621	2.75862	2.93103	3.10345	3.27586	3.44828	3.62069	3.7931	3.96552	4.13793	4.31034	4.48276	4.65517	4.82759	5
	% gNaP Reduction	100	NaN	NaN	NaN	NaN	NaN	NaN	NaN	NaN	NaN	NaN	NaN	NaN	NaN	NaN	NaN	NaN	NaN	NaN	NaN	NaN	NaN	NaN	NaN	NaN	NaN	NaN	NaN	NaN	NaN	NaN
		96.5517	NaN	NaN	NaN	NaN	NaN	NaN	NaN	NaN	NaN	NaN	NaN	NaN	NaN	NaN	NaN	NaN	NaN	NaN	NaN	NaN	NaN	NaN	NaN	NaN	NaN	NaN	NaN	NaN	NaN	NaN
		93.1034	NaN	NaN	NaN	NaN	NaN	NaN	NaN	NaN	NaN	NaN	NaN	NaN	NaN	NaN	NaN	NaN	NaN	NaN	NaN	NaN	NaN	NaN	NaN	NaN	NaN	NaN	NaN	NaN	NaN	NaN
		89.6552	NaN	NaN	NaN	NaN	NaN	NaN	NaN	NaN	NaN	NaN	NaN	NaN	NaN	NaN	NaN	NaN	NaN	NaN	NaN	NaN	NaN	NaN	NaN	NaN	NaN	NaN	NaN	NaN	NaN	NaN
		86.2069	NaN	NaN	NaN	NaN	NaN	NaN	NaN	NaN	NaN	NaN	NaN	NaN	NaN	NaN	NaN	NaN	NaN	NaN	NaN	NaN	NaN	NaN	NaN	NaN	NaN	NaN	NaN	NaN	NaN	NaN
		82.7586	NaN	NaN	NaN	NaN	NaN	NaN	NaN	NaN	NaN	NaN	NaN	NaN	NaN	NaN	NaN	NaN	NaN	NaN	NaN	NaN	NaN	NaN	NaN	NaN	NaN	NaN	NaN	NaN	NaN	NaN
		79.3103	NaN	NaN	NaN	NaN	NaN	NaN	NaN	NaN	NaN	NaN	NaN	NaN	NaN	NaN	NaN	NaN	NaN	NaN	NaN	NaN	NaN	NaN	NaN	NaN	NaN	NaN	NaN	NaN	NaN	NaN
		75.8621	NaN	NaN	NaN	NaN	NaN	NaN	NaN	NaN	NaN	NaN	NaN	NaN	NaN	NaN	NaN	NaN	NaN	NaN	NaN	NaN	NaN	NaN	NaN	NaN	NaN	NaN	NaN	NaN	NaN	NaN
		72.4138	NaN	NaN	NaN	NaN	NaN	NaN	NaN	NaN	NaN	NaN	NaN	NaN	NaN	NaN	NaN	NaN	NaN	NaN	NaN	NaN	NaN	NaN	NaN	NaN	NaN	NaN	NaN	NaN	NaN	NaN
		68.9655	NaN	NaN	NaN	NaN	NaN	NaN	NaN	NaN	NaN	NaN	NaN	NaN	NaN	NaN	NaN	NaN	NaN	NaN	NaN	NaN	NaN	NaN	NaN	NaN	NaN	NaN	NaN	NaN	NaN	NaN
		65.5172	NaN	NaN	NaN	NaN	NaN	NaN	NaN	NaN	NaN	NaN	NaN	NaN	NaN	NaN	NaN	NaN	NaN	NaN	NaN	NaN	NaN	NaN	NaN	NaN	NaN	NaN	NaN	NaN	NaN	NaN
		62.069	NaN	NaN	NaN	NaN	NaN	NaN	NaN	NaN	NaN	NaN	NaN	NaN	NaN	NaN	NaN	NaN	NaN	NaN	NaN	NaN	NaN	NaN	NaN	NaN	NaN	NaN	NaN	NaN	NaN	NaN
		58.6207	NaN	NaN	NaN	NaN	NaN	NaN	NaN	NaN	NaN	NaN	NaN	NaN	NaN	NaN	NaN	NaN	NaN	NaN	NaN	NaN	NaN	NaN	NaN	NaN	NaN	NaN	NaN	NaN	0.580121	0.964243
		55.1724	NaN	NaN	NaN	NaN	NaN	NaN	NaN	NaN	NaN	NaN	NaN	NaN	NaN	NaN	NaN	NaN	NaN	NaN	NaN	NaN	NaN	NaN	NaN	NaN	NaN	0.429009	0.955195	0.963207	1.38222	1.57866
		51.7241	NaN	NaN	NaN	NaN	NaN	NaN	NaN	NaN	NaN	NaN	NaN	NaN	NaN	NaN	NaN	NaN	NaN	NaN	NaN	NaN	NaN	NaN	NaN	0.275368	0.662114	1.28117	1.37401	1.58347	1.72616	1.83048
		48.2759	NaN	NaN	NaN	NaN	NaN	NaN	NaN	NaN	NaN	NaN	NaN	NaN	NaN	NaN	NaN	NaN	NaN	NaN	NaN	NaN	NaN	1.01201	1.26401	1.23063	1.35148	1.52756	1.71917	1.86436	1.95532	2.11409
		44.8276	NaN	NaN	NaN	NaN	NaN	NaN	NaN	NaN	NaN	NaN	NaN	NaN	NaN	NaN	NaN	NaN	NaN	NaN	0.330078	0.896391	1.03093	1.1805	1.32963	1.48507	1.66209	1.83712	1.96898	2.0823	2.20436	2.31384
		41.3793	NaN	NaN	NaN	NaN	NaN	NaN	NaN	NaN	NaN	NaN	NaN	NaN	NaN	NaN	NaN	NaN	NaN	0.816288	0.991666	1.14636	1.29638	1.43482	1.58907	1.76753	1.94101	2.08072	2.18711	2.30339	2.41236	2.48352
		37.931	NaN	NaN	NaN	NaN	NaN	NaN	NaN	NaN	NaN	NaN	NaN	NaN	NaN	NaN	NaN	0.754805	0.946387	1.10211	1.24797	1.3901	1.53529	1.68407	1.86615	2.03259	2.17025	2.2962	2.39069	2.48679	2.59262	2.62159
		34.4828	NaN	NaN	NaN	NaN	NaN	NaN	NaN	NaN	NaN	NaN	NaN	NaN	NaN	0.671868	0.884763	1.04579	1.19392	1.3296	1.47376	1.60804	1.76496	1.94898	2.10762	2.26056	2.38378	2.49818	2.58093	2.67296	2.72758	2.73399
		31.0345	NaN	NaN	NaN	NaN	NaN	NaN	NaN	NaN	NaN	NaN	NaN	NaN	0.821308	0.988025	1.13399	1.26949	1.41095	1.53858	1.68333	1.83517	2.0035	2.16998	2.32445	2.44635	2.56332	2.66562	2.76105	2.81969	2.84357	2.80237
		27.5862	NaN	NaN	NaN	NaN	NaN	NaN	NaN	NaN	NaN	NaN	0.743998	0.924654	1.07008	1.21132	1.34098	1.47204	1.60176	1.73756	1.88509	2.06168	2.22293	2.37234	2.50725	2.6393	2.74618	2.84239	2.90368	2.92774	2.92603	2.8326
		24.1379	NaN	NaN	NaN	NaN	NaN	NaN	NaN	NaN	0.642979	0.855542	1.00702	1.14653	1.27655	1.40051	1.53081	1.65761	1.78931	1.93416	2.10662	2.26304	2.41781	2.55593	2.68426	2.78588	2.88224	2.97085	3.01036	3.01744	2.96725	2.82092
		20.6897	NaN	NaN	NaN	NaN	NaN	NaN	NaN	0.775743	0.942826	1.07655	1.20988	1.33531	1.45975	1.57815	1.704	1.83182	1.97361	2.13591	2.30323	2.45936	2.59276	2.72381	2.82981	2.94565	3.0419	3.08689	3.10111	3.08899	2.98177	2.76153
		17.2414	NaN	NaN	NaN	NaN	NaN	0.675622	0.869015	1.01238	1.14111	1.26676	1.38274	1.49897	1.62615	1.74256	1.87092	2.0055	2.15958	2.32209	2.48449	2.63639	2.7689	2.88103	3.00109	3.09985	3.16416	3.19752	3.17061	3.11008	2.93965	2.62503
		13.7931	NaN	NaN	NaN	NaN	0.778748	0.939748	1.07182	1.19556	1.31812	1.43014	1.54527	1.66208	1.78325	1.90047	2.0337	2.18174	2.343	2.50506	2.64048	2.79576	2.91301	3.02968	3.13159	3.20696	3.24959	3.25884	3.20403	3.09668	2.86212	2.26499
		10.3448	NaN	NaN	0.671038	0.852412	0.992081	1.12135	1.23758	1.35602	1.4665	1.57973	1.6992	1.81203	1.93325	2.06049	2.19664	2.35537	2.50922	2.66785	2.81217	2.95108	3.05853	3.15815	3.24833	3.31548	3.3337	3.31363	3.22848	3.05817	2.71337	4.04775
		6.89655	NaN	0.757282	0.914968	1.03985	1.16355	1.27958	1.39184	1.50386	1.61553	1.73109	1.84345	1.96047	2.07675	2.20886	2.36835	2.51774	2.66287	2.80973	2.96651	3.08939	3.18212	3.2877	3.3628	3.3873	3.40311	3.35637	3.22548	2.9671	2.38272	1.42264
		3.44828	0.822314	0.962891	1.0838	1.19666	1.32092	1.42747	1.53102	1.64279	1.75341	1.85732	1.97272	2.09199	2.22024	2.36496	2.5209	2.67889	2.83606	2.97116	3.09554	3.2158	3.31257	3.38535	3.43972	3.45944	3.44174	3.33856	3.16988	2.81164	3.96657	0.198979
		0	1	1.12189	1.24266	1.34432	1.45249	1.56125	1.66759	1.77848	1.88641	2.00291	2.11424	2.23403	2.37197	2.52201	2.67552	2.82777	2.95943	3.1041	3.21274	3.31693	3.41672	3.48759	3.5224	3.49781	3.44661	3.31126	3.07331	2.45569	1.78142	0.135099
C (Bottom) Burst Amplitude			IAPP (pA)
			0	0.172414	0.344828	0.517241	0.689655	0.862069	1.03448	1.2069	1.37931	1.55172	1.72414	1.89655	2.06897	2.24138	2.41379	2.58621	2.75862	2.93103	3.10345	3.27586	3.44828	3.62069	3.7931	3.96552	4.13793	4.31034	4.48276	4.65517	4.82759	5
	% gNaP Reduction	100	NaN	NaN	NaN	NaN	NaN	NaN	NaN	NaN	NaN	NaN	NaN	NaN	NaN	NaN	NaN	NaN	NaN	NaN	NaN	NaN	NaN	NaN	NaN	NaN	NaN	NaN	NaN	NaN	NaN	NaN
		96.5517	NaN	NaN	NaN	NaN	NaN	NaN	NaN	NaN	NaN	NaN	NaN	NaN	NaN	NaN	NaN	NaN	NaN	NaN	NaN	NaN	NaN	NaN	NaN	NaN	NaN	NaN	NaN	NaN	NaN	NaN
		93.1034	NaN	NaN	NaN	NaN	NaN	NaN	NaN	NaN	NaN	NaN	NaN	NaN	NaN	NaN	NaN	NaN	NaN	NaN	NaN	NaN	NaN	NaN	NaN	NaN	NaN	NaN	NaN	NaN	NaN	NaN
		89.6552	NaN	NaN	NaN	NaN	NaN	NaN	NaN	NaN	NaN	NaN	NaN	NaN	NaN	NaN	NaN	NaN	NaN	NaN	NaN	NaN	NaN	NaN	NaN	NaN	NaN	NaN	NaN	NaN	NaN	NaN
		86.2069	NaN	NaN	NaN	NaN	NaN	NaN	NaN	NaN	NaN	NaN	NaN	NaN	NaN	NaN	NaN	NaN	NaN	NaN	NaN	NaN	NaN	NaN	NaN	NaN	NaN	NaN	NaN	NaN	NaN	NaN
		82.7586	NaN	NaN	NaN	NaN	NaN	NaN	NaN	NaN	NaN	NaN	NaN	NaN	NaN	NaN	NaN	NaN	NaN	NaN	NaN	NaN	NaN	NaN	NaN	NaN	NaN	NaN	NaN	NaN	NaN	NaN
		79.3103	NaN	NaN	NaN	NaN	NaN	NaN	NaN	NaN	NaN	NaN	NaN	NaN	NaN	NaN	NaN	NaN	NaN	NaN	NaN	NaN	NaN	NaN	NaN	NaN	NaN	NaN	NaN	NaN	NaN	NaN
		75.8621	NaN	NaN	NaN	NaN	NaN	NaN	NaN	NaN	NaN	NaN	NaN	NaN	NaN	NaN	NaN	NaN	NaN	NaN	NaN	NaN	NaN	NaN	NaN	NaN	NaN	NaN	NaN	NaN	NaN	NaN
		72.4138	NaN	NaN	NaN	NaN	NaN	NaN	NaN	NaN	NaN	NaN	NaN	NaN	NaN	NaN	NaN	NaN	NaN	NaN	NaN	NaN	NaN	NaN	NaN	NaN	NaN	NaN	NaN	NaN	NaN	NaN
		68.9655	NaN	NaN	NaN	NaN	NaN	NaN	NaN	NaN	NaN	NaN	NaN	NaN	NaN	NaN	NaN	NaN	NaN	NaN	NaN	NaN	NaN	NaN	NaN	NaN	NaN	NaN	NaN	NaN	NaN	NaN
		65.5172	NaN	NaN	NaN	NaN	NaN	NaN	NaN	NaN	NaN	NaN	NaN	NaN	NaN	NaN	NaN	NaN	NaN	NaN	NaN	NaN	NaN	NaN	NaN	NaN	NaN	NaN	NaN	NaN	NaN	NaN
		62.069	NaN	NaN	NaN	NaN	NaN	NaN	NaN	NaN	NaN	NaN	NaN	NaN	NaN	NaN	NaN	NaN	NaN	NaN	NaN	NaN	NaN	NaN	NaN	NaN	NaN	NaN	NaN	NaN	NaN	NaN
		58.6207	NaN	NaN	NaN	NaN	NaN	NaN	NaN	NaN	NaN	NaN	NaN	NaN	NaN	NaN	NaN	NaN	NaN	NaN	NaN	NaN	NaN	NaN	NaN	NaN	NaN	NaN	NaN	NaN	0.289831	0.286832
		55.1724	NaN	NaN	NaN	NaN	NaN	NaN	NaN	NaN	NaN	NaN	NaN	NaN	NaN	NaN	NaN	NaN	NaN	NaN	NaN	NaN	NaN	NaN	NaN	NaN	NaN	0.123729	0.2	0.297262	0.293898	0.306559
		51.7241	NaN	NaN	NaN	NaN	NaN	NaN	NaN	NaN	NaN	NaN	NaN	NaN	NaN	NaN	NaN	NaN	NaN	NaN	NaN	NaN	NaN	NaN	NaN	0.237288	0.261864	0.232203	0.285763	0.321469	0.311343	0.323971
		48.2759	NaN	NaN	NaN	NaN	NaN	NaN	NaN	NaN	NaN	NaN	NaN	NaN	NaN	NaN	NaN	NaN	NaN	NaN	NaN	NaN	NaN	0.0829205	0.146893	0.223729	0.287797	0.321887	0.319948	0.323245	0.334915	0.339639
		44.8276	NaN	NaN	NaN	NaN	NaN	NaN	NaN	NaN	NaN	NaN	NaN	NaN	NaN	NaN	NaN	NaN	NaN	NaN	0.12339	0.168362	0.234576	0.265603	0.295807	0.311556	0.336542	0.322276	0.330395	0.33439	0.346584	0.350605
		41.3793	NaN	NaN	NaN	NaN	NaN	NaN	NaN	NaN	NaN	NaN	NaN	NaN	NaN	NaN	NaN	NaN	NaN	0.270056	0.274092	0.291525	0.315076	0.329298	0.334463	0.33597	0.334237	0.33789	0.338983	0.352742	0.352354	0.360421
		37.931	NaN	NaN	NaN	NaN	NaN	NaN	NaN	NaN	NaN	NaN	NaN	NaN	NaN	NaN	NaN	0.313097	0.311864	0.316102	0.327684	0.344746	0.346942	0.36122	0.360291	0.348249	0.346398	0.349751	0.351412	0.355932	0.363668	0.372203
		34.4828	NaN	NaN	NaN	NaN	NaN	NaN	NaN	NaN	NaN	NaN	NaN	NaN	NaN	0.355254	0.347327	0.343051	0.352542	0.357181	0.360555	0.369209	0.379661	0.373349	0.354073	0.358126	0.357627	0.360214	0.366449	0.370508	0.371559	0.374657
		31.0345	NaN	NaN	NaN	NaN	NaN	NaN	NaN	NaN	NaN	NaN	NaN	NaN	0.39435	0.377724	0.38178	0.3843	0.384504	0.381724	0.387254	0.397579	0.387571	0.368856	0.363002	0.360238	0.366102	0.36661	0.3682	0.375562	0.374616	0.376508
		27.5862	NaN	NaN	NaN	NaN	NaN	NaN	NaN	NaN	NaN	NaN	0.453621	0.435351	0.424859	0.412806	0.412542	0.406471	0.411017	0.408866	0.406312	0.403718	0.392193	0.369868	0.367707	0.361695	0.371106	0.377454	0.383051	0.37951	0.381318	0.375562
		24.1379	NaN	NaN	NaN	NaN	NaN	NaN	NaN	NaN	0.548399	0.508475	0.488136	0.472034	0.447814	0.449395	0.43832	0.432814	0.423854	0.424939	0.414872	0.405982	0.392279	0.376358	0.378338	0.375464	0.383205	0.387797	0.387325	0.381282	0.386441	0.382814
		20.6897	NaN	NaN	NaN	NaN	NaN	NaN	NaN	0.602157	0.554479	0.536045	0.520904	0.502373	0.484746	0.474294	0.462321	0.450363	0.445587	0.436441	0.422082	0.406596	0.392699	0.384622	0.379819	0.385989	0.394989	0.394105	0.389614	0.392211	0.393974	0.392413
		17.2414	NaN	NaN	NaN	NaN	NaN	0.701017	0.653977	0.618402	0.584322	0.569115	0.539322	0.531279	0.503107	0.498566	0.473123	0.470734	0.458051	0.439322	0.429616	0.414068	0.400161	0.399384	0.394576	0.395384	0.40452	0.397458	0.393503	0.393079	0.397288	0.395085
		13.7931	NaN	NaN	NaN	NaN	0.759938	0.71138	0.671186	0.638086	0.600892	0.577563	0.55829	0.536678	0.51651	0.507773	0.490395	0.480123	0.458499	0.446566	0.434237	0.422073	0.407382	0.40693	0.402741	0.406921	0.403661	0.400542	0.398164	0.397937	0.406471	0.400199
		10.3448	NaN	NaN	0.852881	0.828683	0.778208	0.733898	0.694915	0.655593	0.629892	0.603107	0.577053	0.554426	0.536562	0.517879	0.510324	0.483874	0.46405	0.452253	0.437367	0.424708	0.416065	0.415113	0.414943	0.413017	0.408271	0.405559	0.403182	0.400577	0.406945	0.278612
		6.89655	NaN	0.933128	0.88523	0.839322	0.786839	0.748974	0.709282	0.681356	0.644633	0.615385	0.589104	0.56879	0.548496	0.534361	0.510734	0.490812	0.470847	0.453607	0.440829	0.430361	0.426695	0.419932	0.419541	0.414623	0.410169	0.411831	0.411069	0.414614	0.406968	0.297175
		3.44828	0.985311	0.936636	0.896723	0.857029	0.811418	0.76933	0.726603	0.693695	0.661142	0.63632	0.605961	0.584144	0.564355	0.546139	0.512043	0.488301	0.471581	0.456798	0.446159	0.439848	0.433898	0.430442	0.419557	0.419426	0.416297	0.413288	0.415537	0.418132	0.280646	0.301695
		0	1	0.957627	0.906591	0.872542	0.824653	0.788504	0.755525	0.717891	0.68194	0.657853	0.631602	0.601335	0.583239	0.547547	0.517239	0.492393	0.479507	0.45943	0.452024	0.448	0.440678	0.434026	0.427872	0.420723	0.416688	0.418305	0.41731	0.421072	0.298305	0.318644
B & D			Control		50% gCAN Reduction		100% gCAN Reduction		10% gNaP Reduction		20% gNaP Reduction
		IAPP (pA)	Frequency	Amplitude	Frequency	Amplitude	Frequency	Amplitude	Frequency	Amplitude	Frequency	Amplitude
		0	1	1	0.987403	0.861017	0.94894	0.574818	NaN	NaN	NaN	NaN
		0.17241	1.12189	0.957627	1.11154	0.823305	1.0874	0.543644	NaN	NaN	NaN	NaN
		0.34483	1.24266	0.906591	1.24207	0.770621	1.23197	0.504906	0.671038	0.852881	NaN	NaN
		0.51724	1.34432	0.872542	1.37026	0.728814	1.37124	0.472203	0.852412	0.828683	NaN	NaN
		0.68966	1.45249	0.824653	1.49746	0.688444	1.51739	0.459784	0.992081	0.778208	NaN	NaN
		0.86207	1.56125	0.788504	1.62712	0.646893	1.68674	0.403525	1.12135	0.733898	NaN	NaN
		1.0345	1.66759	0.755525	1.7533	0.604694	1.85449	0.40339	1.23758	0.694915	NaN	NaN
		1.2069	1.77848	0.717891	1.88673	0.566686	2.04538	0.345763	1.35602	0.655593	0.775743	0.602157
		1.3793	1.88641	0.68194	2.0211	0.537401	2.18602	0.344325	1.4665	0.629892	0.942826	0.554479
		1.5517	2.00291	0.657853	2.16178	0.497246	2.35771	0.330073	1.57973	0.603107	1.07655	0.536045
		1.7241	2.11424	0.631602	2.31236	0.476707	2.55915	0.306823	1.6992	0.577053	1.20988	0.520904
		1.8966	2.23403	0.601335	2.47617	0.448191	2.76807	0.29201	1.81203	0.554426	1.33531	0.502373
		2.069	2.37197	0.583239	2.64714	0.438136	2.99159	0.281733	1.93325	0.536562	1.45975	0.484746
		2.2414	2.52201	0.547547	2.85179	0.416333	3.22198	0.269249	2.06049	0.517879	1.57815	0.474294
		2.4138	2.67552	0.517239	3.05444	0.398231	3.47221	0.25865	2.19664	0.510324	1.704	0.462321
		2.5862	2.82777	0.492393	3.28685	0.378983	3.74764	0.269997	2.35537	0.483874	1.83182	0.450363
		2.7586	2.95943	0.479507	3.51201	0.363032	4.12377	0.258939	2.50922	0.46405	1.97361	0.445587
		2.931	3.1041	0.45943	3.76093	0.348101	4.4794	0.242672	2.66785	0.452253	2.13591	0.436441
		3.1034	3.21274	0.452024	3.98768	0.332429	4.86676	0.232588	2.81217	0.437367	2.30323	0.422082
		3.2759	3.31693	0.448	4.21657	0.320763	5.27845	0.220763	2.95108	0.424708	2.45936	0.406596
		3.4483	3.41672	0.440678	4.43503	0.311665	5.67209	0.213676	3.05853	0.416065	2.59276	0.392699
		3.6207	3.48759	0.434026	4.63102	0.301265	6.12779	0.206743	3.15815	0.415113	2.72381	0.384622
		3.7931	3.5224	0.427872	4.79852	0.296931	6.54853	0.199932	3.24833	0.414943	2.82981	0.379819
		3.9655	3.49781	0.420723	4.95388	0.28769	6.97737	0.189957	3.31548	0.413017	2.94565	0.385989
		4.1379	3.44661	0.416688	5.09082	0.28405	7.38181	0.178011	3.3337	0.408271	3.0419	0.394989
		4.3103	3.31126	0.418305	5.10955	0.276662	7.77731	0.164934	3.31363	0.405559	3.08689	0.394105
		4.4828	3.07331	0.41731	5.1166	0.276078	8.27463	0.148507	3.22848	0.403182	3.10111	0.389614
		4.6552	2.45569	0.421072	4.99397	0.274933	8.63098	0.127105	3.05817	0.400577	3.08899	0.392211
		4.8276	1.78142	0.298305	4.89448	0.257352	5.1743	0.120271	2.71337	0.406945	2.98177	0.393974
		5	0.135099	0.318644	5.42025	0.198016	2.85108	0.131525	4.04775	0.278612	2.76153	0.392413
