# Supplementary material for: Predictions and experimental tests of a new biophysical model of the mammalian respiratory oscillator
Source: eLife. 2022 Jul 7;11:e74762. doi: 10.7554/eLife.74762 (PMC9262387; doi:10.7554/eLife.74762)
Supplement: Figure 1—source data 1. [file elife-74762-fig1-data1.xlsx]

## Sheet: Figure 1
A (Top) Burst Frequency			IAPP (pA)
			0	0.172414	0.344828	0.517241	0.689655	0.862069	1.03448	1.2069	1.37931	1.55172	1.72414	1.89655	2.06897	2.24138	2.41379	2.58621	2.75862	2.93103	3.10345	3.27586	3.44828	3.62069	3.7931	3.96552	4.13793	4.31034	4.48276	4.65517	4.82759	5
	% gCAN Reduction	100	0.942891	1.07711	1.21276	1.33944	1.47809	1.62518	1.77359	1.9325	2.10305	2.27664	2.47169	2.67391	2.89518	3.13752	3.40467	3.68837	4.01984	4.35846	4.73208	5.14115	5.54738	5.96857	6.40759	6.77938	7.14084	7.58639	8.29795	9.24674	NaN	NaN
		96.5517	0.952025	1.07902	1.22414	1.35354	1.48195	1.62754	1.77783	1.93689	2.10456	2.27759	2.46856	2.67168	2.88486	3.12439	3.38996	3.67532	3.98299	4.3273	4.67633	5.05529	5.44098	5.83259	6.22524	6.6124	6.95236	7.32582	7.95255	8.77377	NaN	NaN
		93.1034	0.954312	1.07758	1.21587	1.34925	1.48322	1.63229	1.77482	1.93635	2.10182	2.27629	2.46369	2.66118	2.87449	3.11137	3.35953	3.64949	3.95292	4.27043	4.62228	4.99962	5.37283	5.79476	6.17585	6.48825	6.73509	7.03229	7.63846	8.37287	NaN	NaN
		89.6552	0.946322	1.08349	1.21553	1.3505	1.48473	1.63682	1.78031	1.93551	2.09758	2.27791	2.45747	2.65928	2.867	3.0909	3.33748	3.60694	3.89651	4.19139	4.5319	4.88159	5.25776	5.62462	5.99211	6.31773	6.53597	6.80785	7.24769	7.97476	NaN	NaN
		86.2069	0.950729	1.08608	1.21947	1.35118	1.48905	1.63039	1.78383	1.93551	2.09729	2.2651	2.44717	2.63899	2.84993	3.07832	3.32587	3.58581	3.86931	4.17744	4.48508	4.83557	5.18807	5.53515	5.85928	6.16022	6.4282	6.58446	6.9348	7.44239	0.143995	NaN
		82.7586	0.9546	1.09079	1.21846	1.35812	1.49252	1.6342	1.78058	1.93606	2.09579	2.26443	2.44614	2.6346	2.84197	3.05857	3.2983	3.56055	3.83518	4.13225	4.45878	4.7832	5.12717	5.41569	5.72823	6.00291	6.22275	6.4933	6.76067	7.14726	4.24243	NaN
		79.3103	0.958794	1.08996	1.22234	1.35374	1.49515	1.6285	1.77858	1.93196	2.09099	2.25871	2.44172	2.62438	2.82312	3.03551	3.27346	3.53294	3.80412	4.09193	4.3852	4.67037	4.97431	5.26055	5.56572	5.88029	6.19349	6.30616	6.4519	6.96393	5.77817	0.531576
		75.8621	0.962293	1.09371	1.22414	1.35831	1.49777	1.62968	1.77983	1.92895	2.08233	2.2494	2.41906	2.61378	2.81185	3.02266	3.25338	3.48764	3.74161	3.99077	4.27803	4.57571	4.88991	5.23666	5.58107	5.84957	5.9983	6.05609	6.28359	6.6346	6.60621	3.62549
		72.4138	0.966112	1.09749	1.22709	1.36171	1.49341	1.63229	1.7766	1.92703	2.07788	2.24323	2.41905	2.59803	2.79802	3.00662	3.21922	3.45634	3.71393	3.98016	4.26672	4.56921	4.86999	5.16255	5.45304	5.60864	5.80472	6.03965	6.1226	6.47233	6.99772	5.38037
		68.9655	0.969368	1.1013	1.23077	1.36412	1.49583	1.63324	1.7716	1.91782	2.08263	2.23873	2.40846	2.58282	2.77351	2.97284	3.18825	3.4329	3.67784	3.93413	4.21805	4.50085	4.77559	5.02178	5.26962	5.49576	5.76905	5.86083	5.86181	6.15899	6.75085	6.50612
		65.5172	0.973094	1.10446	1.234	1.35992	1.49144	1.63302	1.77482	1.91539	2.0687	2.23678	2.40335	2.57128	2.76549	2.95817	3.18782	3.39992	3.63479	3.87467	4.14262	4.38639	4.65405	4.91614	5.19915	5.45514	5.59924	5.67428	5.70542	5.90198	6.4321	6.10704
		62.069	0.968926	1.10664	1.23365	1.36315	1.49339	1.63158	1.77756	1.92322	2.06685	2.21673	2.38588	2.57234	2.75095	2.96068	3.15659	3.37455	3.60451	3.83155	4.08053	4.32589	4.60029	4.87298	5.1202	5.30961	5.46214	5.56786	5.58616	5.6388	6.14106	6.29272
		58.6207	0.973243	1.10665	1.23511	1.35931	1.49624	1.62353	1.7586	1.91377	2.05274	2.22115	2.36672	2.54035	2.71947	2.9064	3.11655	3.32636	3.54352	3.76528	4.02199	4.28717	4.53467	4.76894	4.99159	5.20213	5.34575	5.48144	5.44477	5.45058	5.8755	6.05469
		55.1724	0.977453	1.10597	1.23197	1.36351	1.49364	1.62754	1.76062	1.90307	2.05571	2.20613	2.37046	2.53425	2.70472	2.90478	3.10234	3.30513	3.52504	3.74656	3.98302	4.21204	4.45703	4.69464	4.87706	5.07915	5.26677	5.32568	5.31622	5.27181	5.59498	5.89311
		51.7241	0.980481	1.10882	1.23639	1.36654	1.48798	1.6292	1.76318	1.90255	2.05184	2.19582	2.36369	2.52609	2.70025	2.88158	3.07228	3.27113	3.48328	3.70873	3.93668	4.14939	4.36498	4.59139	4.81537	5.02116	5.1274	5.20061	5.22741	5.11525	5.39862	5.96334
		48.2759	0.984293	1.11271	1.23824	1.36193	1.4897	1.62026	1.7528	1.89097	2.0397	2.1892	2.34464	2.50605	2.67655	2.85951	3.04462	3.2399	3.44296	3.65348	3.86577	4.07023	4.29643	4.52985	4.72038	4.8781	4.99738	5.12729	5.08075	5.0237	5.15481	5.64674
		44.8276	0.980633	1.1156	1.23696	1.36233	1.49383	1.61673	1.74522	1.892	2.03321	2.17815	2.33304	2.48568	2.65558	2.82352	3.00735	3.19319	3.40316	3.60385	3.82404	4.05458	4.25576	4.44251	4.58504	4.79281	4.9524	4.95046	4.97615	4.86532	4.97552	5.5721
		41.3793	0.98414	1.11135	1.23936	1.36111	1.48776	1.61743	1.75074	1.88241	2.02391	2.1691	2.32747	2.47798	2.63971	2.80573	2.98385	3.18206	3.36837	3.57045	3.77017	3.95955	4.14335	4.35596	4.55768	4.71374	4.7748	4.87561	4.87226	4.78551	4.72426	5.37374
		37.931	0.98798	1.11458	1.2375	1.36472	1.48128	1.6107	1.74848	1.87894	2.01467	2.16098	2.3057	2.46027	2.61568	2.78281	2.95738	3.12484	3.31253	3.51447	3.70084	3.89717	4.10439	4.28787	4.41241	4.58757	4.70933	4.78637	4.8014	4.68732	4.5597	5.24995
		34.4828	0.990764	1.11662	1.24102	1.35553	1.48602	1.60515	1.73058	1.86693	2.00792	2.14898	2.29974	2.44819	2.60861	2.75974	2.92839	3.11353	3.29012	3.47477	3.66521	3.85246	4.00765	4.20125	4.36617	4.49983	4.59843	4.68111	4.66035	4.55598	4.38566	5.0307
		31.0345	0.988752	1.1168	1.24066	1.35871	1.48108	1.60953	1.73552	1.86717	2.00146	2.13531	2.28603	2.4294	2.57526	2.73896	2.90664	3.0702	3.24265	3.42924	3.59487	3.78542	3.96419	4.11966	4.25826	4.4109	4.49376	4.54943	4.57814	4.43004	4.18353	4.9251
		27.5862	0.992473	1.11509	1.23768	1.36151	1.47679	1.59944	1.73281	1.85951	1.988	2.12384	2.27115	2.41391	2.56416	2.71003	2.8729	3.05098	3.21428	3.38615	3.56202	3.71766	3.88366	4.05788	4.17729	4.32356	4.3793	4.46173	4.42127	4.32589	4.06178	4.67827
		24.1379	0.994505	1.11919	1.24028	1.35137	1.47935	1.59691	1.71812	1.84749	1.98829	2.11339	2.25237	2.3939	2.54464	2.69658	2.85869	3.00877	3.17465	3.33052	3.49345	3.67328	3.83825	3.96343	4.10094	4.2327	4.30664	4.3081	4.30344	4.19259	3.95433	4.49725
		20.6897	0.991384	1.11921	1.24122	1.35592	1.47382	1.59667	1.71958	1.84749	1.97363	2.11	2.24	2.37623	2.5152	2.66342	2.81506	2.97297	3.14717	3.30782	3.44968	3.59801	3.76133	3.89702	4.01972	4.14611	4.18	4.19096	4.21056	4.07043	3.83035	4.30451
		17.2414	0.995752	1.11645	1.23584	1.35632	1.46704	1.59304	1.71232	1.84026	1.9648	2.08922	2.22943	2.37081	2.50884	2.64742	2.79567	2.95148	3.09406	3.24984	3.39943	3.55307	3.68329	3.8104	3.93533	4.04007	4.05971	4.10652	4.08798	3.95011	3.71272	4.1318
		13.7931	0.998738	1.11919	1.23603	1.35535	1.47296	1.58627	1.70584	1.83153	1.95437	2.08591	2.21013	2.34195	2.48571	2.61967	2.77045	2.91287	3.05815	3.1982	3.34772	3.49852	3.6243	3.73102	3.8465	3.92446	3.95944	4.04265	3.96257	3.80082	3.55027	3.95488
		10.3448	0.997959	1.11937	1.23807	1.35117	1.46873	1.58694	1.7056	1.82262	1.9448	2.07229	2.1949	2.32453	2.45852	2.60019	2.73667	2.87962	3.02399	3.17282	3.29647	3.43406	3.57213	3.6676	3.75216	3.82575	3.88772	3.88237	3.8372	3.675	3.36183	3.78557
		6.89655	0.999212	1.11816	1.23418	1.3504	1.46179	1.57556	1.6924	1.8153	1.93451	2.06111	2.18382	2.3138	2.44582	2.57957	2.71077	2.84236	2.97898	3.11617	3.25215	3.36892	3.50955	3.59106	3.682	3.72416	3.76494	3.75991	3.65975	3.55845	3.23683	3.63129
		3.44828	1.0048	1.11937	1.23548	1.34566	1.46263	1.57188	1.69044	1.80624	1.92599	2.04354	2.16846	2.28929	2.41905	2.55265	2.68459	2.82196	2.9449	3.06423	3.20184	3.31808	3.42644	3.51581	3.59391	3.6326	3.65926	3.61913	3.5664	3.37215	2.97086	NaN
		0	1	1.11628	1.23308	1.34527	1.45219	1.57256	1.68096	1.79802	1.91459	2.03615	2.15451	2.28051	2.39661	2.53037	2.64602	2.78209	2.90124	3.03477	3.14906	3.26253	3.34872	3.44583	3.50712	3.53709	3.54953	3.51057	3.39059	3.1673	2.72607	NaN
A (Bottom) Burst Amplitude			IAPP (pA)
			0	0.172414	0.344828	0.517241	0.689655	0.862069	1.03448	1.2069	1.37931	1.55172	1.72414	1.89655	2.06897	2.24138	2.41379	2.58621	2.75862	2.93103	3.10345	3.27586	3.44828	3.62069	3.7931	3.96552	4.13793	4.31034	4.48276	4.65517	4.82759	5
	% gCAN Reduction	100	0.645756	0.597325	0.580801	0.5744	0.546251	0.516605	0.468054	0.443791	0.403494	0.365422	0.334397	0.315613	0.301011	0.289903	0.276409	0.266029	0.248616	0.237169	0.23014	0.221519	0.210332	0.204371	0.192995	0.183194	0.175132	0.157264	0.134643	0.112777	NaN	NaN
		96.5517	0.670664	0.655039	0.60163	0.573755	0.557405	0.529789	0.498428	0.450916	0.418075	0.387074	0.347487	0.331112	0.31466	0.295811	0.281094	0.269142	0.260347	0.246878	0.234837	0.228363	0.215356	0.205409	0.196131	0.189827	0.180324	0.167024	0.142066	0.121091	NaN	NaN
		93.1034	0.702491	0.673605	0.641093	0.60973	0.575604	0.528444	0.506082	0.463386	0.427866	0.39752	0.37035	0.342735	0.327721	0.302406	0.292996	0.277793	0.265298	0.254771	0.241605	0.230518	0.219956	0.20899	0.202314	0.19327	0.18752	0.173816	0.14858	0.127728	NaN	NaN
		89.6552	0.726015	0.694592	0.655443	0.612449	0.582355	0.547548	0.525454	0.472516	0.439323	0.406067	0.376633	0.35	0.331537	0.311788	0.297435	0.280376	0.269467	0.256663	0.245949	0.235141	0.223028	0.214076	0.207204	0.198301	0.189813	0.180626	0.157271	0.132698	NaN	NaN
		86.2069	0.740775	0.703067	0.667999	0.633164	0.595564	0.558848	0.51804	0.483204	0.445155	0.407396	0.383963	0.357911	0.338196	0.319088	0.30286	0.289395	0.274939	0.264248	0.254409	0.237534	0.22676	0.220864	0.210197	0.203031	0.193332	0.183137	0.16747	0.141724	0.113007	NaN
		82.7586	0.760148	0.720422	0.684122	0.638653	0.599379	0.568804	0.529042	0.486767	0.451821	0.422401	0.388327	0.361946	0.340749	0.326809	0.311125	0.295254	0.279234	0.269447	0.255549	0.24353	0.234376	0.223731	0.214584	0.20601	0.201902	0.191966	0.175107	0.151664	0.122694	0.142066
		79.3103	0.78321	0.736162	0.699211	0.663838	0.62022	0.580105	0.541957	0.497678	0.462237	0.428288	0.396878	0.369534	0.348558	0.333641	0.314839	0.298023	0.284801	0.269864	0.261825	0.247661	0.233247	0.225046	0.215075	0.212813	0.210352	0.200655	0.186479	0.157479	0.123411	0.138192
		75.8621	0.789207	0.749481	0.717866	0.675461	0.630787	0.596248	0.550806	0.511929	0.470569	0.43344	0.403777	0.373876	0.355166	0.333067	0.312994	0.306186	0.291157	0.27929	0.262972	0.251564	0.238844	0.23329	0.233916	0.223475	0.213451	0.207128	0.197737	0.170007	0.130653	0.132841
		72.4138	0.809041	0.759571	0.726286	0.686762	0.639299	0.597594	0.559416	0.514824	0.478901	0.436766	0.405571	0.380334	0.357011	0.337659	0.320591	0.310336	0.291859	0.279935	0.275153	0.26214	0.249402	0.247871	0.23714	0.233688	0.219044	0.214574	0.206364	0.177847	0.141823	0.135328
		68.9655	0.820572	0.776522	0.738062	0.693542	0.654269	0.61885	0.573767	0.53286	0.489317	0.453008	0.414719	0.386626	0.361777	0.343572	0.329605	0.315055	0.301891	0.286869	0.27818	0.264855	0.256976	0.25142	0.241351	0.234962	0.226455	0.218614	0.214623	0.190223	0.152006	0.141936
		65.5172	0.836255	0.789841	0.743337	0.705489	0.666597	0.627191	0.584529	0.546889	0.497232	0.453595	0.420639	0.396726	0.371617	0.350323	0.328798	0.318447	0.308554	0.299565	0.2808	0.273175	0.260122	0.252534	0.246368	0.238074	0.231029	0.232623	0.224456	0.208723	0.166166	0.144844
		62.069	0.849631	0.80437	0.761993	0.717113	0.677164	0.632841	0.589552	0.553124	0.502399	0.472772	0.429966	0.401031	0.382688	0.359422	0.33964	0.324398	0.313838	0.300833	0.287944	0.280556	0.271587	0.262753	0.255819	0.248939	0.24422	0.23422	0.231789	0.214752	0.177171	0.153282
		58.6207	0.85655	0.814864	0.768809	0.726476	0.687731	0.650061	0.598815	0.555796	0.51639	0.477468	0.441144	0.408696	0.383044	0.365439	0.349121	0.328044	0.319052	0.305431	0.293066	0.282345	0.280015	0.272279	0.267564	0.261164	0.252323	0.243365	0.239864	0.227354	0.188793	0.158912
		55.1724	0.870849	0.827375	0.787105	0.731965	0.704755	0.647102	0.61173	0.566484	0.52048	0.485687	0.446125	0.420761	0.398794	0.37131	0.355166	0.34393	0.331773	0.318347	0.310286	0.298763	0.292965	0.284951	0.275843	0.266437	0.256446	0.247779	0.245065	0.235943	0.200336	0.164051
		51.7241	0.875	0.83464	0.78854	0.743266	0.710919	0.660555	0.621416	0.57116	0.52909	0.492536	0.459779	0.428918	0.402102	0.380556	0.362185	0.348445	0.333357	0.324954	0.315344	0.305248	0.299788	0.290037	0.283425	0.270798	0.260567	0.255157	0.255442	0.246381	0.209005	0.168829
		48.2759	0.89345	0.847959	0.801097	0.756827	0.715909	0.672125	0.63756	0.589642	0.545449	0.497232	0.467343	0.432997	0.412477	0.393611	0.376548	0.362283	0.352186	0.33321	0.323207	0.313351	0.306188	0.296206	0.28216	0.274359	0.270793	0.269893	0.263767	0.259225	0.223531	0.176481
		44.8276	0.909133	0.866524	0.814012	0.767482	0.721486	0.692305	0.652214	0.59944	0.549323	0.503488	0.472878	0.442605	0.416351	0.395263	0.378557	0.366198	0.34453	0.336263	0.325105	0.319597	0.311477	0.300229	0.290037	0.28599	0.282066	0.272423	0.269858	0.268251	0.238413	0.182042
		41.3793	0.916513	0.866928	0.828362	0.775231	0.732347	0.692036	0.650475	0.599862	0.560947	0.514385	0.482841	0.45203	0.426361	0.404123	0.387747	0.373193	0.360104	0.350981	0.343271	0.327937	0.312879	0.306441	0.301447	0.291218	0.286787	0.283871	0.282126	0.279091	0.262249	0.192212
		37.931	0.925277	0.875807	0.833385	0.783948	0.745849	0.706565	0.649979	0.604935	0.563745	0.528511	0.487736	0.46128	0.431332	0.411132	0.397434	0.377836	0.369889	0.351633	0.34548	0.332291	0.321941	0.314136	0.311987	0.300738	0.299649	0.292802	0.28714	0.293501	0.280015	0.199862
		34.4828	0.933579	0.893969	0.845582	0.798801	0.752893	0.713023	0.667861	0.616697	0.579177	0.531538	0.492864	0.469133	0.436631	0.41805	0.404478	0.38924	0.379283	0.362964	0.348478	0.339952	0.329121	0.322878	0.316421	0.311577	0.306458	0.30296	0.301596	0.299388	0.293526	0.21208
		31.0345	0.944649	0.897198	0.853116	0.812685	0.763754	0.721095	0.67407	0.630766	0.579399	0.547682	0.505969	0.475707	0.446897	0.430137	0.412834	0.398684	0.378097	0.366715	0.35983	0.348486	0.344188	0.331731	0.328932	0.319505	0.31718	0.312209	0.305471	0.307746	0.303711	0.228339
		27.5862	0.951107	0.906884	0.859574	0.816559	0.774321	0.729167	0.675064	0.636301	0.59276	0.549101	0.516035	0.480371	0.460308	0.438799	0.424878	0.40444	0.390683	0.37935	0.364733	0.365429	0.358887	0.340663	0.335998	0.329435	0.319845	0.318348	0.316324	0.318507	0.317879	0.244132
		24.1379	0.952952	0.909709	0.872847	0.817528	0.786062	0.737508	0.692946	0.641836	0.594096	0.558267	0.519454	0.493107	0.467664	0.445729	0.423646	0.413284	0.402522	0.388229	0.375026	0.367505	0.355611	0.347525	0.344126	0.334381	0.331621	0.329137	0.330329	0.332001	0.329336	0.259252
		20.6897	0.961255	0.916571	0.876076	0.833349	0.791932	0.741544	0.698659	0.64714	0.60612	0.562641	0.531281	0.499923	0.475311	0.454128	0.438514	0.417981	0.404766	0.39559	0.389317	0.377648	0.372046	0.36042	0.353982	0.347875	0.353014	0.345633	0.343993	0.340897	0.336127	0.272126
		17.2414	0.95941	0.926257	0.888274	0.839483	0.794867	0.753652	0.708594	0.660747	0.61859	0.57264	0.536174	0.505166	0.484317	0.458003	0.444649	0.433244	0.414969	0.405377	0.394418	0.390922	0.381458	0.370419	0.369373	0.368081	0.360374	0.353834	0.356208	0.353336	0.344673	0.278803
		13.7931	0.971863	0.928275	0.885404	0.84691	0.803673	0.756342	0.711574	0.667435	0.62527	0.580348	0.547719	0.517528	0.488855	0.472209	0.457718	0.442196	0.426901	0.417724	0.402177	0.402075	0.394381	0.386661	0.38044	0.379382	0.365713	0.362249	0.360547	0.358952	0.358688	0.279505
		10.3448	0.97786	0.948858	0.893296	0.850138	0.806902	0.7628	0.722005	0.678283	0.629613	0.589305	0.555742	0.522325	0.49636	0.477694	0.467307	0.453204	0.437851	0.426872	0.419096	0.404964	0.400967	0.400254	0.392552	0.384559	0.374867	0.373006	0.375986	0.369119	0.363948	0.287532
		6.89655	0.984779	0.938365	0.898319	0.854336	0.821872	0.774065	0.737454	0.686894	0.638838	0.599908	0.564028	0.532657	0.504039	0.488291	0.47156	0.456835	0.439401	0.434031	0.420532	0.414677	0.405974	0.402402	0.394834	0.384571	0.378957	0.383942	0.377826	0.372506	0.364852	0.276719
		3.44828	0.988007	0.952894	0.896166	0.871448	0.816001	0.777154	0.738487	0.688089	0.645756	0.608303	0.571696	0.538637	0.515708	0.493494	0.482112	0.461791	0.451002	0.441782	0.427276	0.420775	0.411297	0.406948	0.398934	0.391328	0.386162	0.386632	0.385182	0.374792	0.380135	NaN
		0	1	0.958545	0.912669	0.869834	0.826261	0.783611	0.739004	0.692873	0.65355	0.612392	0.580172	0.548513	0.519834	0.497912	0.484156	0.47417	0.462303	0.446863	0.432932	0.423959	0.420258	0.416637	0.405121	0.406096	0.399412	0.393911	0.38872	0.38924	0.394384	NaN
C (Top) Burst Frequency			IAPP (pA)
			0	0.172414	0.344828	0.517241	0.689655	0.862069	1.03448	1.2069	1.37931	1.55172	1.72414	1.89655	2.06897	2.24138	2.41379	2.58621	2.75862	2.93103	3.10345	3.27586	3.44828	3.62069	3.7931	3.96552	4.13793	4.31034	4.48276	4.65517	4.82759	5
	% gNaP Reduction	100	NaN	NaN	NaN	NaN	NaN	NaN	NaN	NaN	NaN	NaN	NaN	NaN	NaN	NaN	NaN	NaN	NaN	NaN	NaN	NaN	NaN	NaN	NaN	NaN	NaN	NaN	NaN	NaN	NaN	NaN
		96.5517	NaN	NaN	NaN	NaN	NaN	NaN	NaN	NaN	NaN	NaN	NaN	NaN	NaN	NaN	NaN	NaN	NaN	NaN	NaN	NaN	NaN	NaN	NaN	NaN	NaN	NaN	NaN	NaN	NaN	NaN
		93.1034	NaN	NaN	NaN	NaN	NaN	NaN	NaN	NaN	NaN	NaN	NaN	NaN	NaN	NaN	NaN	NaN	NaN	NaN	NaN	NaN	NaN	NaN	NaN	NaN	NaN	NaN	NaN	NaN	NaN	NaN
		89.6552	NaN	NaN	NaN	NaN	NaN	NaN	NaN	NaN	NaN	NaN	NaN	NaN	NaN	NaN	NaN	NaN	NaN	NaN	NaN	NaN	NaN	NaN	NaN	NaN	NaN	NaN	NaN	NaN	NaN	NaN
		86.2069	NaN	NaN	NaN	NaN	NaN	NaN	NaN	NaN	NaN	NaN	NaN	NaN	NaN	NaN	NaN	NaN	NaN	NaN	NaN	NaN	NaN	NaN	NaN	NaN	NaN	NaN	NaN	NaN	NaN	NaN
		82.7586	NaN	NaN	NaN	NaN	NaN	NaN	NaN	NaN	NaN	NaN	NaN	NaN	NaN	NaN	NaN	NaN	NaN	NaN	NaN	NaN	NaN	NaN	NaN	NaN	NaN	NaN	NaN	NaN	NaN	NaN
		79.3103	NaN	NaN	NaN	NaN	NaN	NaN	NaN	NaN	NaN	NaN	NaN	NaN	NaN	NaN	NaN	NaN	NaN	NaN	NaN	NaN	NaN	NaN	NaN	NaN	NaN	NaN	NaN	NaN	NaN	NaN
		75.8621	NaN	NaN	NaN	NaN	NaN	NaN	NaN	NaN	NaN	NaN	NaN	NaN	NaN	NaN	NaN	NaN	NaN	NaN	NaN	NaN	NaN	NaN	NaN	NaN	NaN	NaN	NaN	NaN	NaN	NaN
		72.4138	NaN	NaN	NaN	NaN	NaN	NaN	NaN	NaN	NaN	NaN	NaN	NaN	NaN	NaN	NaN	NaN	NaN	NaN	NaN	NaN	NaN	NaN	NaN	NaN	NaN	NaN	NaN	NaN	NaN	NaN
		68.9655	NaN	NaN	NaN	NaN	NaN	NaN	NaN	NaN	NaN	NaN	NaN	NaN	NaN	NaN	NaN	NaN	NaN	NaN	NaN	NaN	NaN	NaN	NaN	NaN	NaN	NaN	NaN	NaN	NaN	NaN
		65.5172	NaN	NaN	NaN	NaN	NaN	NaN	NaN	NaN	NaN	NaN	NaN	NaN	NaN	NaN	NaN	NaN	NaN	NaN	NaN	NaN	NaN	NaN	NaN	NaN	NaN	NaN	NaN	NaN	NaN	NaN
		62.069	NaN	NaN	NaN	NaN	NaN	NaN	NaN	NaN	NaN	NaN	NaN	NaN	NaN	NaN	NaN	NaN	NaN	NaN	NaN	NaN	NaN	NaN	NaN	NaN	NaN	NaN	NaN	NaN	NaN	0.280603
		58.6207	NaN	NaN	NaN	NaN	NaN	NaN	NaN	NaN	NaN	NaN	NaN	NaN	NaN	NaN	NaN	NaN	NaN	NaN	NaN	NaN	NaN	NaN	NaN	NaN	NaN	NaN	NaN	0.331931	0.886672	0.951592
		55.1724	NaN	NaN	NaN	NaN	NaN	NaN	NaN	NaN	NaN	NaN	NaN	NaN	NaN	NaN	NaN	NaN	NaN	NaN	NaN	NaN	NaN	NaN	NaN	NaN	NaN	0.412303	0.830172	0.920245	1.48653	1.63505
		51.7241	NaN	NaN	NaN	NaN	NaN	NaN	NaN	NaN	NaN	NaN	NaN	NaN	NaN	NaN	NaN	NaN	NaN	NaN	NaN	NaN	NaN	NaN	NaN	0.416526	0.764454	0.85294	1.46202	1.64163	1.78666	1.92737
		48.2759	NaN	NaN	NaN	NaN	NaN	NaN	NaN	NaN	NaN	NaN	NaN	NaN	NaN	NaN	NaN	NaN	NaN	NaN	NaN	NaN	NaN	0.497478	0.700498	1.00172	1.43849	1.60522	1.76241	1.90162	2.04873	2.18131
		44.8276	NaN	NaN	NaN	NaN	NaN	NaN	NaN	NaN	NaN	NaN	NaN	NaN	NaN	NaN	NaN	NaN	NaN	NaN	NaN	0.463559	0.566489	0.985649	1.39836	1.55685	1.7257	1.86591	2.00709	2.14942	2.2805	2.39743
		41.3793	NaN	NaN	NaN	NaN	NaN	NaN	NaN	NaN	NaN	NaN	NaN	NaN	NaN	NaN	NaN	NaN	NaN	0.695224	0.866373	1.19888	1.34802	1.50574	1.66711	1.81585	1.96151	2.10049	2.23982	2.3664	2.49248	2.58111
		37.931	NaN	NaN	NaN	NaN	NaN	NaN	NaN	NaN	NaN	NaN	NaN	NaN	NaN	NaN	NaN	0.774739	0.978372	1.13928	1.3002	1.45114	1.61075	1.75511	1.90124	2.05397	2.19023	2.32268	2.4369	2.55699	2.6495	2.72144
		34.4828	NaN	NaN	NaN	NaN	NaN	NaN	NaN	NaN	NaN	NaN	NaN	NaN	NaN	0.685494	0.92246	1.08447	1.24346	1.38766	1.5347	1.68125	1.82685	1.96882	2.11623	2.25597	2.39477	2.51971	2.63388	2.74139	2.82026	2.84899
		31.0345	NaN	NaN	NaN	NaN	NaN	NaN	NaN	NaN	NaN	NaN	NaN	NaN	0.840993	1.02312	1.1602	1.32116	1.45589	1.60564	1.7435	1.88992	2.03474	2.1685	2.31501	2.45524	2.58153	2.70518	2.79071	2.88334	2.94395	2.94934
		27.5862	NaN	NaN	NaN	NaN	NaN	NaN	NaN	NaN	NaN	NaN	0.757148	0.942293	1.09618	1.23602	1.38414	1.52096	1.65762	1.7988	1.93424	2.08118	2.2212	2.37051	2.50139	2.63294	2.75256	2.8504	2.93415	3.01395	3.04042	3.04177
		24.1379	NaN	NaN	NaN	NaN	NaN	NaN	NaN	NaN	0.650429	0.867303	1.02445	1.16995	1.30232	1.4372	1.5737	1.70612	1.83693	1.98552	2.12575	2.25843	2.40035	2.53214	2.67935	2.78446	2.90451	3.01616	3.08646	3.13795	3.11531	3.07211
		20.6897	NaN	NaN	NaN	NaN	NaN	NaN	NaN	0.784351	0.949327	1.09123	1.22686	1.36091	1.48776	1.61743	1.74698	1.89437	2.03064	2.15454	2.3024	2.43812	2.55984	2.70751	2.8232	2.93583	3.03918	3.11166	3.19027	3.21668	3.18578	3.09889
		17.2414	NaN	NaN	NaN	NaN	NaN	0.680904	0.868731	1.01785	1.1524	1.27931	1.41137	1.53648	1.66635	1.79626	1.91652	2.05392	2.19178	2.33899	2.45298	2.58817	2.72638	2.84486	2.9562	3.07169	3.14709	3.22762	3.27879	3.26182	3.20543	3.07626
		13.7931	NaN	NaN	NaN	NaN	0.782082	0.938603	1.07709	1.20341	1.32877	1.45003	1.57302	1.69561	1.82525	1.95526	2.08683	2.23198	2.34196	2.48363	2.62401	2.74569	2.86427	2.99362	3.10613	3.20588	3.288	3.33727	3.36299	3.31164	3.22481	2.98225
		10.3448	NaN	NaN	0.671718	0.854242	0.995446	1.12039	1.24532	1.36917	1.4845	1.60792	1.73183	1.85667	1.98109	2.10697	2.23489	2.36846	2.4967	2.6222	2.76431	2.88726	3.00975	3.12363	3.22213	3.30471	3.35964	3.39906	3.40014	3.33442	3.18549	2.87207
		6.89655	NaN	0.760578	0.913539	1.04218	1.1635	1.28682	1.40081	1.51846	1.64235	1.75757	1.87838	2.00349	2.12597	2.2552	2.37623	2.51166	2.64308	2.78091	2.89715	3.02415	3.14021	3.24132	3.32505	3.39859	3.45309	3.48469	3.42371	3.3067	3.12869	2.59259
		3.44828	0.82326	0.959776	1.08395	1.20489	1.31719	1.4298	1.54778	1.6628	1.77832	1.90045	2.02013	2.14473	2.26985	2.39766	2.53073	2.65158	2.7698	2.90368	3.03001	3.14555	3.24851	3.33749	3.42781	3.48866	3.52178	3.51758	3.42835	3.27607	2.96409	3.40764
		0	1	1.11628	1.23308	1.34527	1.45219	1.57256	1.68096	1.79802	1.91459	2.03615	2.15451	2.28051	2.39661	2.53037	2.64602	2.78209	2.90124	3.03477	3.14906	3.26253	3.34872	3.44583	3.50712	3.53709	3.54953	3.51057	3.39059	3.1673	2.72607	NaN
C (Bottom) Burst Amplitude			IAPP (pA)
			0	0.172414	0.344828	0.517241	0.689655	0.862069	1.03448	1.2069	1.37931	1.55172	1.72414	1.89655	2.06897	2.24138	2.41379	2.58621	2.75862	2.93103	3.10345	3.27586	3.44828	3.62069	3.7931	3.96552	4.13793	4.31034	4.48276	4.65517	4.82759	5
	% gNaP Reduction	100	NaN	NaN	NaN	NaN	NaN	NaN	NaN	NaN	NaN	NaN	NaN	NaN	NaN	NaN	NaN	NaN	NaN	NaN	NaN	NaN	NaN	NaN	NaN	NaN	NaN	NaN	NaN	NaN	NaN	NaN
		96.5517	NaN	NaN	NaN	NaN	NaN	NaN	NaN	NaN	NaN	NaN	NaN	NaN	NaN	NaN	NaN	NaN	NaN	NaN	NaN	NaN	NaN	NaN	NaN	NaN	NaN	NaN	NaN	NaN	NaN	NaN
		93.1034	NaN	NaN	NaN	NaN	NaN	NaN	NaN	NaN	NaN	NaN	NaN	NaN	NaN	NaN	NaN	NaN	NaN	NaN	NaN	NaN	NaN	NaN	NaN	NaN	NaN	NaN	NaN	NaN	NaN	NaN
		89.6552	NaN	NaN	NaN	NaN	NaN	NaN	NaN	NaN	NaN	NaN	NaN	NaN	NaN	NaN	NaN	NaN	NaN	NaN	NaN	NaN	NaN	NaN	NaN	NaN	NaN	NaN	NaN	NaN	NaN	NaN
		86.2069	NaN	NaN	NaN	NaN	NaN	NaN	NaN	NaN	NaN	NaN	NaN	NaN	NaN	NaN	NaN	NaN	NaN	NaN	NaN	NaN	NaN	NaN	NaN	NaN	NaN	NaN	NaN	NaN	NaN	NaN
		82.7586	NaN	NaN	NaN	NaN	NaN	NaN	NaN	NaN	NaN	NaN	NaN	NaN	NaN	NaN	NaN	NaN	NaN	NaN	NaN	NaN	NaN	NaN	NaN	NaN	NaN	NaN	NaN	NaN	NaN	NaN
		79.3103	NaN	NaN	NaN	NaN	NaN	NaN	NaN	NaN	NaN	NaN	NaN	NaN	NaN	NaN	NaN	NaN	NaN	NaN	NaN	NaN	NaN	NaN	NaN	NaN	NaN	NaN	NaN	NaN	NaN	NaN
		75.8621	NaN	NaN	NaN	NaN	NaN	NaN	NaN	NaN	NaN	NaN	NaN	NaN	NaN	NaN	NaN	NaN	NaN	NaN	NaN	NaN	NaN	NaN	NaN	NaN	NaN	NaN	NaN	NaN	NaN	NaN
		72.4138	NaN	NaN	NaN	NaN	NaN	NaN	NaN	NaN	NaN	NaN	NaN	NaN	NaN	NaN	NaN	NaN	NaN	NaN	NaN	NaN	NaN	NaN	NaN	NaN	NaN	NaN	NaN	NaN	NaN	NaN
		68.9655	NaN	NaN	NaN	NaN	NaN	NaN	NaN	NaN	NaN	NaN	NaN	NaN	NaN	NaN	NaN	NaN	NaN	NaN	NaN	NaN	NaN	NaN	NaN	NaN	NaN	NaN	NaN	NaN	NaN	NaN
		65.5172	NaN	NaN	NaN	NaN	NaN	NaN	NaN	NaN	NaN	NaN	NaN	NaN	NaN	NaN	NaN	NaN	NaN	NaN	NaN	NaN	NaN	NaN	NaN	NaN	NaN	NaN	NaN	NaN	NaN	NaN
		62.069	NaN	NaN	NaN	NaN	NaN	NaN	NaN	NaN	NaN	NaN	NaN	NaN	NaN	NaN	NaN	NaN	NaN	NaN	NaN	NaN	NaN	NaN	NaN	NaN	NaN	NaN	NaN	NaN	NaN	0.0936347
		58.6207	NaN	NaN	NaN	NaN	NaN	NaN	NaN	NaN	NaN	NaN	NaN	NaN	NaN	NaN	NaN	NaN	NaN	NaN	NaN	NaN	NaN	NaN	NaN	NaN	NaN	NaN	NaN	0.0952491	0.206145	0.266747
		55.1724	NaN	NaN	NaN	NaN	NaN	NaN	NaN	NaN	NaN	NaN	NaN	NaN	NaN	NaN	NaN	NaN	NaN	NaN	NaN	NaN	NaN	NaN	NaN	NaN	NaN	0.17048	0.206104	0.244891	0.203413	0.241351
		51.7241	NaN	NaN	NaN	NaN	NaN	NaN	NaN	NaN	NaN	NaN	NaN	NaN	NaN	NaN	NaN	NaN	NaN	NaN	NaN	NaN	NaN	NaN	NaN	0.167897	0.226602	0.258303	0.211632	0.235163	0.259498	0.302838
		48.2759	NaN	NaN	NaN	NaN	NaN	NaN	NaN	NaN	NaN	NaN	NaN	NaN	NaN	NaN	NaN	NaN	NaN	NaN	NaN	NaN	NaN	0.206642	0.233764	0.21679	0.224785	0.243504	0.258303	0.28057	0.30738	0.320658
		44.8276	NaN	NaN	NaN	NaN	NaN	NaN	NaN	NaN	NaN	NaN	NaN	NaN	NaN	NaN	NaN	NaN	NaN	NaN	NaN	0.193727	0.26107	0.21608	0.226983	0.25016	0.259296	0.273755	0.289254	0.29947	0.322878	0.317138
		41.3793	NaN	NaN	NaN	NaN	NaN	NaN	NaN	NaN	NaN	NaN	NaN	NaN	NaN	NaN	NaN	NaN	NaN	0.147232	0.210517	0.218797	0.247002	0.254487	0.270184	0.277914	0.283702	0.306005	0.308006	0.332472	0.324624	0.322381
		37.931	NaN	NaN	NaN	NaN	NaN	NaN	NaN	NaN	NaN	NaN	NaN	NaN	NaN	NaN	NaN	0.256541	0.252306	0.255881	0.274616	0.279213	0.290321	0.291087	0.296825	0.302645	0.314201	0.31679	0.325389	0.328146	0.324977	0.331856
		34.4828	NaN	NaN	NaN	NaN	NaN	NaN	NaN	NaN	NaN	NaN	NaN	NaN	NaN	0.308672	0.295203	0.29059	0.302429	0.308994	0.304348	0.314096	0.314029	0.313749	0.325378	0.328749	0.321623	0.328486	0.335309	0.337841	0.334141	0.335193
		31.0345	NaN	NaN	NaN	NaN	NaN	NaN	NaN	NaN	NaN	NaN	NaN	NaN	0.35409	0.342712	0.339972	0.339872	0.332411	0.332565	0.338525	0.333121	0.33278	0.334381	0.334654	0.336666	0.336456	0.337053	0.338868	0.339169	0.342394	0.345695
		27.5862	NaN	NaN	NaN	NaN	NaN	NaN	NaN	NaN	NaN	NaN	0.405065	0.395402	0.380593	0.371669	0.368081	0.363091	0.357749	0.359232	0.357472	0.348708	0.351644	0.345018	0.354642	0.346125	0.343481	0.342701	0.341964	0.349832	0.343795	0.356008
		24.1379	NaN	NaN	NaN	NaN	NaN	NaN	NaN	NaN	0.491492	0.461964	0.444649	0.42354	0.416003	0.402829	0.390262	0.387951	0.380535	0.370664	0.37558	0.367511	0.372207	0.360944	0.360332	0.35778	0.349589	0.352078	0.351516	0.353792	0.358676	0.360937
		20.6897	NaN	NaN	NaN	NaN	NaN	NaN	NaN	0.555351	0.519586	0.486039	0.462433	0.445572	0.430309	0.422701	0.411794	0.399256	0.396925	0.386848	0.384415	0.379741	0.376068	0.366821	0.371385	0.361624	0.357606	0.356289	0.35826	0.364852	0.364314	0.359837
		17.2414	NaN	NaN	NaN	NaN	NaN	0.676107	0.628371	0.583026	0.545261	0.515925	0.484317	0.466348	0.452546	0.439114	0.427352	0.418235	0.411872	0.405351	0.408048	0.395236	0.378004	0.381897	0.379561	0.368783	0.368219	0.364987	0.369663	0.372343	0.376288	0.362173
		13.7931	NaN	NaN	NaN	NaN	0.7526	0.705258	0.647909	0.615748	0.574723	0.53321	0.510709	0.484059	0.470446	0.450248	0.442447	0.434418	0.420111	0.420265	0.404566	0.404982	0.390758	0.38956	0.38226	0.379247	0.373089	0.377768	0.378155	0.372343	0.374135	0.371956
		10.3448	NaN	NaN	0.864022	0.813653	0.766605	0.72244	0.680556	0.63381	0.597325	0.562884	0.527285	0.500923	0.482091	0.46057	0.459074	0.445018	0.441383	0.419742	0.414207	0.406386	0.403383	0.398308	0.393642	0.38203	0.379603	0.383909	0.381123	0.37738	0.374951	0.377242
		6.89655	NaN	0.917561	0.875923	0.838622	0.791242	0.7416	0.702952	0.663662	0.61589	0.57671	0.545434	0.52284	0.491608	0.47729	0.463838	0.452199	0.440567	0.429889	0.427667	0.415293	0.40504	0.405509	0.394428	0.388467	0.387454	0.385094	0.38199	0.379547	0.37992	0.385633
		3.44828	0.976707	0.93734	0.885117	0.852019	0.811954	0.7623	0.72437	0.677528	0.636429	0.598104	0.567405	0.53396	0.512427	0.495259	0.472082	0.461393	0.4508	0.441609	0.4295	0.420429	0.415393	0.408893	0.396147	0.400856	0.392815	0.393059	0.382362	0.381392	0.386019	0.270969
		0	1	0.958545	0.912669	0.869834	0.826261	0.783611	0.739004	0.692873	0.65355	0.612392	0.580172	0.548513	0.519834	0.497912	0.484156	0.47417	0.462303	0.446863	0.432932	0.423959	0.420258	0.416637	0.405121	0.406096	0.399412	0.393911	0.38872	0.38924	0.394384	NaN
B & D			Control		50% gCAN Reduction		100% gCAN Reduction		10% gNaP Reduction		20% gNaP Reduction
		IAPP (pA)	Frequency	Amplitude	Frequency	Amplitude	Frequency	Amplitude	Frequency	Amplitude	Frequency	Amplitude
		0	1	1	0.980481	0.875	0.942891	0.645756	NaN	NaN	NaN	NaN
		0.17241	1.11628	0.958545	1.10882	0.83464	1.07711	0.597325	NaN	NaN	NaN	NaN
		0.34483	1.23308	0.912669	1.23639	0.78854	1.21276	0.580801	0.671718	0.864022	NaN	NaN
		0.51724	1.34527	0.869834	1.36654	0.743266	1.33944	0.5744	0.854242	0.813653	NaN	NaN
		0.68966	1.45219	0.826261	1.48798	0.710919	1.47809	0.546251	0.995446	0.766605	NaN	NaN
		0.86207	1.57256	0.783611	1.6292	0.660555	1.62518	0.516605	1.12039	0.72244	NaN	NaN
		1.0345	1.68096	0.739004	1.76318	0.621416	1.77359	0.468054	1.24532	0.680556	NaN	NaN
		1.2069	1.79802	0.692873	1.90255	0.57116	1.9325	0.443791	1.36917	0.63381	0.784351	0.555351
		1.3793	1.91459	0.65355	2.05184	0.52909	2.10305	0.403494	1.4845	0.597325	0.949327	0.519586
		1.5517	2.03615	0.612392	2.19582	0.492536	2.27664	0.365422	1.60792	0.562884	1.09123	0.486039
		1.7241	2.15451	0.580172	2.36369	0.459779	2.47169	0.334397	1.73183	0.527285	1.22686	0.462433
		1.8966	2.28051	0.548513	2.52609	0.428918	2.67391	0.315613	1.85667	0.500923	1.36091	0.445572
		2.069	2.39661	0.519834	2.70025	0.402102	2.89518	0.301011	1.98109	0.482091	1.48776	0.430309
		2.2414	2.53037	0.497912	2.88158	0.380556	3.13752	0.289903	2.10697	0.46057	1.61743	0.422701
		2.4138	2.64602	0.484156	3.07228	0.362185	3.40467	0.276409	2.23489	0.459074	1.74698	0.411794
		2.5862	2.78209	0.47417	3.27113	0.348445	3.68837	0.266029	2.36846	0.445018	1.89437	0.399256
		2.7586	2.90124	0.462303	3.48328	0.333357	4.01984	0.248616	2.4967	0.441383	2.03064	0.396925
		2.931	3.03477	0.446863	3.70873	0.324954	4.35846	0.237169	2.6222	0.419742	2.15454	0.386848
		3.1034	3.14906	0.432932	3.93668	0.315344	4.73208	0.23014	2.76431	0.414207	2.3024	0.384415
		3.2759	3.26253	0.423959	4.14939	0.305248	5.14115	0.221519	2.88726	0.406386	2.43812	0.379741
		3.4483	3.34872	0.420258	4.36498	0.299788	5.54738	0.210332	3.00975	0.403383	2.55984	0.376068
		3.6207	3.44583	0.416637	4.59139	0.290037	5.96857	0.204371	3.12363	0.398308	2.70751	0.366821
		3.7931	3.50712	0.405121	4.81537	0.283425	6.40759	0.192995	3.22213	0.393642	2.8232	0.371385
		3.9655	3.53709	0.406096	5.02116	0.270798	6.77938	0.183194	3.30471	0.38203	2.93583	0.361624
		4.1379	3.54953	0.399412	5.1274	0.260567	7.14084	0.175132	3.35964	0.379603	3.03918	0.357606
		4.3103	3.51057	0.393911	5.20061	0.255157	7.58639	0.157264	3.39906	0.383909	3.11166	0.356289
		4.4828	3.39059	0.38872	5.22741	0.255442	8.29795	0.134643	3.40014	0.381123	3.19027	0.35826
		4.6552	3.1673	0.38924	5.11525	0.246381	9.24674	0.112777	3.33442	0.37738	3.21668	0.364852
		4.8276	2.72607	0.394384	5.39862	0.209005	NaN	NaN	3.18549	0.374951	3.18578	0.364314
		5	NaN	NaN	5.96334	0.168829	NaN	NaN	2.87207	0.377242	3.09889	0.359837
