# Supplementary material for: Predictions and experimental tests of a new biophysical model of the mammalian respiratory oscillator
Source: eLife. 2022 Jul 7;11:e74762. doi: 10.7554/eLife.74762 (PMC9262387; doi:10.7554/eLife.74762)
Supplement: Figure 2—source data 1. [file elife-74762-fig2-data1.xlsx]

## Sheet: Figure 2D
Laser (mW)	0.5	1	2	3	4	5
Cell1	3.8	5.8	8.9	11.1	12.2	13.2
Cell2	4.2	5.3	7.5	9.4	10.5	11.1
Cell3	3.8	5.8	7.3	9.8	11.1	11.2
Cell4	4.9	6.1	8.3	9.1	10	10.4
Cell5	4.6	5.5	8.3	9.8	10.8	11
Cell6	5.9	6.9	10.1	11.3	12.4	12.8
Cell7	5.8	5.9	8.1	9.3	10.2	10.6
Cell8	4.8	6.1	9.6	11.1	11.7	12.1
Cell9	6	7.2	10	12.5	12.7	13.7
Cell10	3.8	4.6	7	8.3	9.7	9.7
Cell11	4	6.8	9.1	10.7	12	12.2
Cell12	5.1	6.1	8.4	10.1	10.3	11.2
Mean	4.725	6.00833	8.55	10.2083	11.1333	11.6
SD	0.837882	0.720427	1.02025	1.16655	1.03074	1.20605
SEM	0.241876	0.207969	0.294521	0.336753	0.297549	0.348155
