# Supplementary material for: Predictions and experimental tests of a new biophysical model of the mammalian respiratory oscillator
Source: eLife. 2022 Jul 7;11:e74762. doi: 10.7554/eLife.74762 (PMC9262387; doi:10.7554/eLife.74762)
Supplement: Figure 3—source data 1. [file elife-74762-fig3-data1.xlsx]

## Sheet: Figure 3C
Frequency																																Mean	SEM
0.25	2.067	2.248	1.963	2.464	2.374	2.167	2.065	1.43	1.497	1.543	1.206	1.145	2.183	1.965	2.143	2.155	2.325	1.852	1.957	1.504	1.202	1.816	1.613	1.561	1.48	2.018	1.683	2.207	1.642	1.822	2.005	1.84845	0.0650274
0.5	3.365	2.709	2.489	3.126	3.087	3.128	3.05	2.66	2.463	2.242	2.364	2.165	2.647	2.488	2.875	3.358	3.297	2.884	2.829	2.475	2.496	2.559	2.006	2.812	2.643	2.44	3.075	3.144	2.643	2.336	3.088	2.7401	0.065254
1	3.779	3.427	3.085	3.944	3.334	4.068	3.831	3.803	3.403	3.336	3.549	3.974	3.111	3.012	3.865	4.157	3.624	3.219	3.784	3.499	3.379	3.889	3.612	3.61	4.008	3.32	4.042	3.84	3.463	3.687	3.574	3.62026	0.0556556
2	5.064	4.049	3.954	4.741	3.965	4.682	4.239	4.443	4.069	3.852	4.029	4.088	4.113	4.268	4.574	4.847	3.973	4.288	4.444	4.108	4.013	4.16	4.141	4.333	4.541	3.905	4.242	4.222	3.843	4.061	4.754	4.25823	0.056421
Amplitude																																Mean	SEM
0.25	0.92	0.986	0.863	0.996	0.889	0.894	0.988	0.906	0.931	0.683	0.912	1.004	0.927	0.916	0.942	1.037	0.812	0.986	0.824	0.912	1.035	0.98	0.981	0.832	1.002	0.894	0.943	0.695	0.982	0.902	0.853	0.917	0.0153107
0.5	0.852	1.015	0.75	0.972	0.802	0.812	0.973	0.783	0.864	0.626	0.894	1.042	0.849	0.827	0.736	0.912	0.704	0.941	0.746	0.815	1.024	0.914	0.956	0.765	0.921	0.783	0.94	0.683	0.945	0.802	0.791	0.852871	0.0190236
1	0.69	1.027	0.678	0.902	0.643	0.729	0.912	0.463	0.723	0.589	0.783	1.066	0.743	0.694	0.539	0.721	0.659	0.631	0.686	0.723	1.033	0.771	0.897	0.696	0.742	0.752	0.894	0.642	0.855	0.703	0.682	0.750581	0.0251426
2	0.41	0.976	0.462	0.772	0.392	0.472	0.821	0.187	0.569	0.463	0.443	1.127	0.38	0.463	0.365	0.49	0.463	0.348	0.466	0.524	1.043	0.678	0.683	0.447	0.543	0.313	0.743	0.517	0.629	0.503	0.562	0.556581	0.0383337
