# Supplementary material for: Predictions and experimental tests of a new biophysical model of the mammalian respiratory oscillator
Source: eLife. 2022 Jul 7;11:e74762. doi: 10.7554/eLife.74762 (PMC9262387; doi:10.7554/eLife.74762)
Supplement: Figure 4—figure supplement 1—source data 1. [file elife-74762-fig4-figsupp1-data1.xlsx]

## Sheet: Figure 4-figure supplement 1
TTX (nM)	T1	T2	T3	T4	T5	T6	T7	T8	T-Mean	T-SD	T-SEM
2		10.4			12.3	9.9	8.6	10.4	10.32	1.32929	0.594475
5	39.2	54.2	42.3	62.5	55.5	38.5	46.2	36.4	46.85	9.50444	3.36033
10	86.1	93.9	84.1	86.4	92.2	92.6	90.4	74.4	87.5125	6.36743	2.25122
20	100.1	99.6	99.4	100.3	100	100.7	100	100.1	100.025	0.399106	0.141105
Riluzole (uM)	R1	R2	R3	R4	R5	R6	R-Mean	R-SD	R-SEM
2	8.4			12.3	6.8	7.8	8.825	2.40884	1.20442
5	46.4	52.3	47.3	41.4	65.8	36.4	48.2667	10.1595	4.14758
10	94.7	90.2	85.9	84.4	92.1	81.5	88.1333	5.02102	2.04982
20	100	100.5	99.3	100.1	99.4	100.8	100.017	0.591326	0.241408
