# Supplementary material for: Predictions and experimental tests of a new biophysical model of the mammalian respiratory oscillator
Source: eLife. 2022 Jul 7;11:e74762. doi: 10.7554/eLife.74762 (PMC9262387; doi:10.7554/eLife.74762)
Supplement: Figure 4—source data 1. [file elife-74762-fig4-data1.xlsx]

## Sheet: Figure 4C
Frequency
TTX 5nM							Mean	SEM
0.25	1.467	2.027	1.814	1.865	1.712	1.568	1.74217	0.0833344
0.5	2.296	2.964	2.699	2.564	2.601	2.444	2.59467	0.0931263
1	3.025	3.59	3.249	3.463	3.517	3.345	3.36483	0.0842197
2	3.487	4.057	3.795	4.103	3.702	4.198	3.89033	0.111788
TTX 10nM									Mean	SEM
0.25	1.286	1.136	1.703	0.922	0.962	1.404	1.176	1.125	1.21425	0.0891048
0.5	2.131	2.354	2.908	2.246	1.765	2.36	2.12	2.064	2.2435	0.116223
1	2.422	2.682	3.168	2.85	2.285	3.331	3.02	2.843	2.82512	0.125863
2	2.759	3.22	3.554	3.128	2.87	3.619	3.386	3.174	3.21375	0.107205
Riluzole 5uM							Mean	SEM
0.25	1.395	2.018	1.704	2.021	1.605	1.491	1.70567	0.107969
0.5	2.386	2.922	2.686	3.019	2.553	2.422	2.66467	0.106652
1	2.795	3.456	3.013	3.398	2.989	2.876	3.08783	0.112212
2	3.469	4.186	3.885	4.148	3.732	3.659	3.8465	0.115241
Riluzole 10uM									Mean	SEM
0.25	1.568	1.746	1.047	1.023	1.148	1.625	1.24	1.055	1.3065	0.103811
0.5	2.316	2.366	2.875	1.802	2.065	2.594	2.095	2.165	2.28475	0.118268
1	3.03	2.661	3.373	2.386	2.832	3.172	2.633	2.764	2.85637	0.113004
2	3.587	2.857	3.802	2.929	3.041	3.563	3.014	3.153	3.24325	0.12551
Amplitude
TTX 5nM							Mean	SEM
0.25	0.842	0.83	0.931	0.872	0.948	0.859	0.880333	0.0197259
0.5	0.814	0.793	0.803	0.793	0.883	0.782	0.811333	0.0149948
1	0.681	0.663	0.742	0.723	0.757	0.683	0.708167	0.0154497
2	0.514	0.491	0.559	0.546	0.623	0.499	0.538667	0.0200278
TTX 10nM									Mean	SEM
0.25	0.779	0.752	0.937	0.832	0.882	0.939	0.875	0.775	0.846375	0.0259215
0.5	0.735	0.714	0.812	0.766	0.796	0.897	0.819	0.638	0.772125	0.0276247
1	0.679	0.634	0.742	0.675	0.653	0.809	0.712	0.568	0.684	0.0256334
2	0.533	0.469	0.602	0.503	0.487	0.634	0.589	0.433	0.53125	0.0250662
Riluzole 5uM							Mean	SEM
0.25	0.643	0.711	0.821	0.829	0.674	0.672	0.725	0.0328441
0.5	0.584	0.637	0.762	0.793	0.604	0.587	0.661167	0.0377954
1	0.411	0.503	0.66	0.648	0.502	0.423	0.5245	0.0438807
2	0.354	0.426	0.543	0.582	0.336	0.404	0.440833	0.0410174
Riluzole 10uM									Mean	SEM
0.25	0.591	0.584	0.603	0.512	0.822	0.726	0.54	0.603	0.622625	0.0360466
0.5	0.543	0.513	0.571	0.477	0.769	0.675	0.495	0.554	0.574625	0.0350927
1	0.403	0.428	0.472	0.395	0.671	0.592	0.377	0.453	0.473875	0.0368358
2	0.361	0.368	0.323	0.321	0.589	0.494	0.305	0.378	0.392375	0.0349274
