# Supplementary material for: Predictions and experimental tests of a new biophysical model of the mammalian respiratory oscillator
Source: eLife. 2022 Jul 7;11:e74762. doi: 10.7554/eLife.74762 (PMC9262387; doi:10.7554/eLife.74762)
Supplement: Figure 5—source data 1. [file elife-74762-fig5-data1.xlsx]

## Sheet: Figure 5
E1-Ctr-025mW	z(1)	z(2:101)	z(101:200)	ratio	Freq
Baseline	0.0031	1.87e-05	2.2895e-06	8.16772	8
Stimulation	0.0037	2.6261e-05	3.9396e-06	6.66591	14
Recovery	0.0031	1.87e-05	2.2895e-06	8.16772	7
									Stimulation		Recovery		p-value
E1-Ctr-1mW	z(1)	z(2:101)	z(101:200)	ratio	Freq			Ctr 0.25mW	1.07873	0.0342334	0.962998	0.0146277	0.0456253		0.034413
Baseline	0.004	3.4667e-05	5.2936e-06	6.54885	10			Ctr 1mW	1.10534	0.0340599	0.920162	0.0168665	0.0177064		0.00334904
Stimulation	0.0046	2.7487e-05	6.7496e-06	4.07239	18			CB 1mW	1.23481	0.0889108	1.02791	0.0170895	0.0300763		0.104571
Recovery	0.0035	2.8103e-05	3.7931e-06	7.40898	6			CB 2mW	1.37905	0.136288	1.00952	0.0184581	0.0254364		0.319207
								CB 3mV	1.52746	0.187769	0.996568	0.0112338	0.0246114		0.353982
E1-CB-1mW	z(1)	z(2:101)	z(101:200)	ratio	Freq
Baseline	0.002	6.7279e-07	5.7521e-07	1.16964
Stimulation	0.0023	8.111e-07	6.4949e-07	1.24883
Recovery	0.002	5.9332e-07	5.4842e-07	1.08187
E1-CB-2mW	z(1)	z(2:101)	z(101:200)	ratio	Freq
Baseline	0.002	6.8221e-07	6.4324e-07	1.06058
Stimulation	0.0023	7.7693e-07	6.5665e-07	1.18317
Recovery	0.002	6.3596e-07	5.8028e-07	1.09595
E1-CB-3mW	z(1)	z(2:101)	z(101:200)	ratio	Freq
Baseline	0.0023	6.1256e-07	7.0169e-07	0.872978
Stimulation	0.0026	7.8368e-07	8.0241e-07	0.976658
Recovery	0.0022	7.3947e-07	5.4709e-07	1.35164
E2-Ctr-025mW	z(1)	z(2:101)	z(101:200)	ratio	Freq
Baseline	0.0061	1.4166e-05	3.816e-06	3.71226	8
Stimulation	0.0061	1.2661e-05	3.0889e-06	4.09887	10
Recovery	0.0058	1.0951e-05	3.4903e-06	3.13755	8
E2-Ctr-1mW	z(1)	z(2:101)	z(101:200)	ratio	Freq
Baseline	0.006	3.1436e-05	4.5342e-06	6.93309	9
Stimulation	0.0072	1.9364e-05	4.2991e-06	4.5042	17
Recovery	0.0058	2.305e-05	3.8704e-06	5.95546	6
									Baseline		Stimulation		Recovery		p-value
E2-CB-1mW	z(1)	z(2:101)	z(101:200)	ratio	Freq			Ctr 0.25mW	5.7143	1.06759	5.44318	1.00893	5.3872	1.01582	0.00448266		0.00453348		0.000128621
Baseline	0.0043	1.742e-06	1.2454e-06	1.39875				Ctr 1mW	5.79788	0.647384	3.82134	0.465497	4.99089	0.87257	0.000450214		0.00113311		9.76477e-05
Stimulation	0.0052	1.6821e-06	1.7483e-06	0.962135				CB 1mW	1.0517	0.10365	1.17558	0.110984	1.14962	0.0707166	0.322481		0.111288		0.00335649
Recovery	0.0046	1.7669e-06	1.5774e-06	1.12013				CB 2mW	1.0653	0.0835615	1.18963	0.0210549	1.1534	0.0644343	0.262895		0.000179551		0.00201793
								CB 3mV	0.982618	0.0840189	0.990917	0.00591729	1.04064	0.0839142	0.365154		0.117813		0.197188
E2-CB-2mW	z(1)	z(2:101)	z(101:200)	ratio	Freq
Baseline	0.004	1.4761e-06	1.2102e-06	1.21972
Stimulation	0.0054	1.7709e-06	1.4162e-06	1.25046
Recovery	0.0038	1.4224e-06	1.0867e-06	1.30892
E2-CB-3mW	z(1)	z(2:101)	z(101:200)	ratio	Freq
Baseline	0.0039	1.2399e-06	1.1328e-06	1.09454
Stimulation	0.0063	1.875e-06	1.8567e-06	1.00986
Recovery	0.0039	1.2726e-06	1.2698e-06	1.00221
E3-Ctr-025mW	z(1)	z(2:101)	z(101:200)	ratio	Freq
Baseline	0.0031	7.735e-06	2.8936e-06	2.67314	8
Stimulation	0.0032	8.1315e-06	2.4758e-06	3.28439	14
Recovery	0.003	7.4998e-06	2.5496e-06	2.94156	6
E3-Ctr-1mW	z(1)	z(2:101)	z(101:200)	ratio	Freq
Baseline	0.0037	1.0591e-05	2.9925e-06	3.53918	10
Stimulation	0.0037	6.9588e-06	3.0668e-06	2.26908	15
Recovery	0.0034	7.3496e-06	2.7719e-06	2.65147	8
E3-CB-1mW	z(1)	z(2:101)	z(101:200)	ratio	Freq
Baseline	0.002	6.3113e-07	6.9693e-07	0.905586
Stimulation	0.0023	7.9513e-07	8.1075e-07	0.980734
Recovery	0.002	6.4447e-07	6.8785e-07	0.936934
E3-CB-2mW	z(1)	z(2:101)	z(101:200)	ratio	Freq
Baseline	0.002	6.6785e-07	7.4525e-07	0.896142
Stimulation	0.0026	8.8794e-07	7.2658e-07	1.22208
Recovery	0.0021	8.0168e-07	7.6183e-07	1.05231
E3-CB-3mW	z(1)	z(2:101)	z(101:200)	ratio	Freq
Baseline	0.0021	7.581e-07	6.8154e-07	1.11233
Stimulation	0.0029	8.3152e-07	8.3269e-07	0.998595
Recovery	0.0021	6.8853e-07	6.5329e-07	1.05394
E4-Ctr-025mW	z(1)	z(2:101)	z(101:200)	ratio	Freq
Baseline	0.0035	2.3909e-05	3.2766e-06	7.29689	8
Stimulation	0.0039	2.396e-05	5.4826e-06	4.37019	14
Recovery	0.0032	1.75e-05	2.7049e-06	6.46974	8
E4-Ctr-1mW	z(1)	z(2:101)	z(101:200)	ratio	Freq
Baseline	0.0028	8.706e-06	1.6872e-06	5.16003	8
Stimulation	0.003	5.4004e-06	1.6098e-06	3.3547	18
Recovery	0.0025	3.6895e-06	1.096e-06	3.36633	8
E4-CB-1mW	z(1)	z(2:101)	z(101:200)	ratio	Freq
Baseline	0.0024	8.5451e-07	8.9308e-07	0.956812
Stimulation	0.0026	8.6432e-07	7.731e-07	1.11799
Recovery	0.0024	9.6866e-07	7.5728e-07	1.27913
E4-CB-2mW	z(1)	z(2:101)	z(101:200)	ratio	Freq
Baseline	0.0021	7.1656e-07	8.2698e-07	0.866478
Stimulation	0.0025	9.2082e-07	7.9486e-07	1.15847
Recovery	0.0021	5.6683e-07	5.6437e-07	1.00436
E4-CB-3mW	z(1)	z(2:101)	z(101:200)	ratio	Freq
Baseline	0.002	5.1057e-07	7.2607e-07	0.703197
Stimulation	0.0026	8.4331e-07	8.5744e-07	0.983521
Recovery	0.002	6.3855e-07	7.3441e-07	0.869473
E5-Ctr-025mW	z(1)	z(2:101)	z(101:200)	ratio	Freq
Baseline	0.0056	2.0557e-05	3.0584e-06	6.72149	8
Stimulation	0.0059	2.5298e-05	2.8759e-06	8.79655	11
Recovery	0.0055	1.9009e-05	3.0564e-06	6.21941	8
E5-Ctr-05mW	z(1)	z(2:101)	z(101:200)	ratio	Freq
Baseline	0.0057	2.4424e-05	3.5874e-06	6.80827	8
Stimulation	0.0063	2.2675e-05	4.6216e-06	4.90631	12
Recovery	0.0054	2.379e-05	4.2694e-06	5.57221	9
E5-CB-1mW	z(1)	z(2:101)	z(101:200)	ratio	Freq
Baseline	0.0043	1.2594e-06	1.5215e-06	0.827736
Stimulation	0.0068	3.6978e-06	2.358e-06	1.56819
Recovery	0.0046	1.9485e-06	1.465e-06	1.33003
E5-CB-2mW	z(1)	z(2:101)	z(101:200)	ratio	Freq
Baseline	0.0042	1.74e-06	1.3556e-06	1.28356
Stimulation	0.008	2.6793e-06	2.3628e-06	1.13395
Recovery	0.0044	1.7724e-06	1.3577e-06	1.30544
E5-CB-3mW	z(1)	z(2:101)	z(101:200)	ratio	Freq
Baseline	0.0038	1.3487e-06	1.1935e-06	1.13004
Stimulation	0.0084	2.5905e-06	2.6274e-06	0.985956
Recovery	0.0039	1.1189e-06	1.2084e-06	0.925935
