# Supplementary material for: Predictions and experimental tests of a new biophysical model of the mammalian respiratory oscillator
Source: eLife. 2022 Jul 7;11:e74762. doi: 10.7554/eLife.74762 (PMC9262387; doi:10.7554/eLife.74762)
Supplement: Figure 7—source data 1. [file elife-74762-fig7-data1.xlsx]

## Sheet: Figure 7C
Frequency									Mean	SEM
0	1.024	1.012	0.984	0.992	1.005	1.017	0.982	1.026	1.00525	0.00617238
0.25	3.081	3.052	3.228	2.241	2.444	2.655	2.172	2.236	2.63863	0.151777
0.5	5.544	4.762	5.123	4.536	4.981	3.805	3.254	3.356	4.42012	0.300969
1	7.332	7.123	6.782	7.436	6.855	5.669	6.653	6.081	6.74138	0.214868
2	8.392	7.894	8.241	8.006	7.217	6.639	7.032	6.258	7.45988	0.277943
Amplitude									Mean	SEM
0	0.464	0.516	0.399	0.784	0.682	0.64	0.514	0.581	0.5725	0.044288
0.25	0.45	0.499	0.372	0.632	0.604	0.534	0.413	0.457	0.495125	0.032046
0.5	0.459	0.503	0.364	0.442	0.525	0.402	0.281	0.394	0.42125	0.0278271
1	0.273	0.323	0.277	0.329	0.361	0.291	0.208	0.264	0.29075	0.0166398
2	0.223	0.177	0.222	0.237	0.295	0.269	0.199	0.236	0.23225	0.0131431
