# Supplementary material for: Predictions and experimental tests of a new biophysical model of the mammalian respiratory oscillator
Source: eLife. 2022 Jul 7;11:e74762. doi: 10.7554/eLife.74762 (PMC9262387; doi:10.7554/eLife.74762)
Supplement: Figure 8—source data 1. [file elife-74762-fig8-data1.xlsx]

## Sheet: Figure 8
	A
	Laser Power (w)	dv (mV)
	0.5	4.3785
	1	6.2774
	2	8.5362
	3	9.9334
	4	11.0043
	5	12.0334
	B
		Control		TTX: 0.95*gNaP		TTX: 0.9*gNaP		RZ:h1/2-1.0mV		RZ: h1/2-1.75mV		ICAN 100% Blk
	Laser Power (w)	Amplitude	Frequency (Hz)	Amplitude	Frequency (Hz)	Amplitude	Frequency (Hz)	Amplitude	Frequency (Hz)	Amplitude	Frequency (Hz)	Amplitude	Frequency (Hz)
	0	1	1	NaN	0	NaN	0	NaN	0	NaN	0	0.630231	0.839462
	0.25	0.849396	1.87707	0.831004	1.55039	0.812111	1.11432	0.73252	1.53746	0.659593	1.11629
	0.5	0.786163	2.1718	0.763058	1.88754	0.743209	1.54198	0.661969	1.9116	0.591256	1.60531	0.3488	2.37405
	1	0.67262	2.74718	0.658042	2.46444	0.639092	2.16079	0.546419	2.59059	0.483201	2.31461	0.224568	3.19425
